# Supplementary material
Source: PubMed Central journal article supplement (PMC7253031)
Supplement: jciinsight-5-136570-s091.pdf [file jciinsight-5-136570-s091.pdf]

# SUPPLEMENTARY MATERIALS

## Supplementary Methods

### Study design

The workflow to identify and validate the TME risk score and TME subtypes in gastric cancer is depicted in Fig. S1. We first estimated the absolute abundance levels of the major stromal and immune cell types in the TME using bulk gene expression data, and assessed the prognostic effect of these cells in a discovery cohort. Next, we constructed a TME risk score and validated it in two independent gene expression validation cohorts and three immunohistochemistry validation cohorts. Finally, we stratified patients into four TME subtypes and examined their genomic and molecular features and relation to established molecular subtypes.

### Gene expression data

To explore the prognostic landscape of the TME, we used four gene expression profile (GEP) datasets of resected gastric cancer patients with publicly available clinical information, namely, ACRG (GSE62254) (1), GSE15459 (2), GSE84437 (3), and TCGA stomach adenocarcinoma (STAD). Specifically, the raw microarray data in the ACRG cohort and GSE15459 were retrieved from the Gene Expression Omnibus (GEO), and normalized by the RMA algorithm (package `affy`) using custom chip definition files (Brainarray version 23 (4)) that convert Affymetrix probesets to Entrez gene IDs. For GSE84437 dataset, which was measured by the Illumina platform, we downloaded the normalized gene expression profile from the GEO (package `GEOquery` (5)). The Illumina probes were also mapped to Entrez genes. For multiple probes mapping to the same Entrez gene, we selected the one with the maximum mean expression level as the surrogate for the Entrez gene using the function of `collapseRows` (6) (package `WGCNA`). The normalized gene expression data in the TCGA STAD cohort was downloaded from the TCGA PanCanAtlas data portal (<https://gdc.cancer.gov/about-data/publications/pancanatlas>). All gene expression levels were  $\log_2$  transformed and batch effects were removed using the `Combat` algorithm (7) (package `SVA`). The clinical and treatment information for ACRG cohort was retrieved from the original publication (1). The clinical outcome data for GSE15459 and GSE84437 cohorts were downloaded from the GEO. For the TCGA STAD cohort, the clinical information and genomics features were retrieved from the PanCanAtlas data portal.

### Patients in the IHC cohorts

For validated purposes, we analyzed IHC data for gastric cancer patients who were treated with surgical resection at the Nanfang Hospital of Southern Medical University (SMU) and the First Affiliated Hospital of Sun Yat-Sen University (SYSU), Guangzhou, China. Written-informed consent was obtained from all of the enrolled patients. All procedures were performed in accordance with the Declaration of Helsinki and approved by the Institutional Review Boards at the two participating centers. Inclusion criteria were diagnosis of primary, biopsy-confirmed GC, surgical resection, and the availability of hematoxylin and eosin (H&E) slides with invasive tumor components, follow-up data, and clinicopathologic characteristics. No patients had received previous treatment. We included three independent cohorts of 753 patients in this study, including 247 and 234 consecutive patients treated at SMU between January 2005 and December 2007, January 2008 and December 2009, and 272 patients treated at SYSU from January 2005 to December 2007. The three cohorts were denoted as SMU1, SMU2 and SYSU. The patient characteristics are listed in Table S1.

#### 44 **IHC data**

45 FFPE samples were cut into 4- $\mu$ m thick sections, which were then processed for  
46 immunohistochemistry staining as previously described (8, 9). The samples were de-waxed in  
47 xylene and rehydrated in decreasing concentrations of ethanol. Prior to staining, the sections  
48 were subjected to endogenous peroxidase blocking in 1% H<sub>2</sub>O<sub>2</sub> solution diluted in methanol for  
49 10 minutes and then heated in a microwave for 30 minutes with 10 mmol/L citrate buffer (pH 6.0).  
50 Serum blocking was performed using 10% normal rabbit serum for 30 minutes. The slides were  
51 incubated overnight with an antibody against human CD57 (1:100 dilution; NeoMarker, clone NK1)  
52 for NK cells, CD34 (1:200 dilution; Abcam, ab81289) for endothelial cells, or  $\alpha$ -SMA (smooth  
53 muscle actin; 1:100 dilution; Abcam, ab5694) for fibroblasts at 4°C, followed by incubation with  
54 an amplification system with a labeled polymer/HRP (EnVision™, DakoCytomation, Denmark) at  
55 37°C for 30 min. The reaction was visualized using diaminobenzidine (DAB)+ chromogen, and  
56 nucleus was counterstained using hematoxylin. In all assays, we included negative control slides  
57 with the primary antibodies omitted. Every staining run contained a slide of positive control. And  
58 all slides were stained with DAB dyeing for the same time for each antibody.

59 IHC staining was independently assessed by two pathologists who were blinded to patient  
60 characteristics. A third pathologist was consulted when different opinions arose between the two  
61 primary pathologists and discrepancies were resolved by consensus. Under 200 magnification,  
62 photographs of 5 representative fields were captured using an inverted research microscope  
63 (model DM IRB; Leica Germany); identical settings were used for each photograph. The  
64 nucleated stained cells in each area were quantified and expressed as the number of cells per  
65 field. For the CD57 or CD34 staining in tumor tissue, the number of positive cells or microvessels  
66 was calculated in each field and expressed as the mean value of the five fields (cells per field or  
67 microvessels per field). Intensity of fibroblast cell staining ( $\alpha$ -SMA) was graded as 0 (negative  
68 staining), 1 (weak staining), 2 (moderate staining) and 3 (strong staining); staining extent was  
69 graded as 0 (0%–4%), 1 (5%–24%), 2 (25%–49%), 3 (50%–74%) and 4 (>75%). Values of the  
70 intensity and the extent were multiplied as the level of  $\alpha$ -SMA.

#### 71 **Identification of prognostic cell types in the TME**

72 For the gene expression cohorts, the absolute abundance levels of major cell types within the  
73 TME were computed for each patient by the Microenvironment Cell Populations-counter (MCP-  
74 counter) algorithm (10). Here, the abundance levels were estimated for 8 immune and 2 stroma  
75 cell types by averaging pre-selected sets of marker genes (Table S2). The immune cells include  
76 T cells, CD8 T cells, cytotoxic lymphocytes, NK cells, B lineage, monocytic lineage, myeloid  
77 dendritic cells, and neutrophils. The stroma cells are fibroblasts and endothelial cells. To  
78 investigate the association of each TME cell type with overall survival (OS), we selected the  
79 ACRG cohort (n = 300) as the discovery cohort, because detailed clinical and treatment outcome  
80 information with sufficient follow-up is available. To assess robustness of the prognostic  
81 significance, we used two different methods, namely the Cox regression analysis (package  
82 survival) and random survival forest model (package randomForestSRC(11)). Specifically, we  
83 conducted univariate Cox regression analysis of each cell type with or without controlling for stage  
84 and treatment in the ACRG cohort, and examined the corresponding Wald test *P* values. To  
85 implement the random forest algorithm, we generated 500 stratified bootstrap resamples of  
86 approximately the same size (n = 296) of the ACRG cohort, controlling for treatment and stage.  
87 We used the 'logrank' metric as the splitting rule. The hyperparameter of the random forest model,  
88 namely mtry (number of cell types randomly sampled at each split) and nodesize (average

89 number of patients in a terminal node) were determined based on the out-of-bag error. The  
90 variable importance was calculated from the resulting model, which provided a ranking order of  
91 the features.

## 92 **Development and validation of a TME-based risk score**

93 Through the above analyses, NK cells, endothelial cells, and fibroblasts were identified as the  
94 most robust prognostic markers. We first explored their pairwise Pearson correlation in the ACRG  
95 cohort. Considering a high correlation and similar prognostic effects, we defined a Stroma score  
96 as the geometric mean of the estimated abundance of endothelial cells and fibroblasts to reflect  
97 the overall stromal quantity (12). To further validate the stroma score, the correlations of an EMT  
98 signature (1, 13), two fibroblast signatures (14) and the StromalScore provided by the ESTIMATE  
99 algorithm (15) were calculated regarding to proposed stroma score in each GEP cohort. The  
100 abundance of NK cells were correlated with those of T or CD8 T cells as well as a T-cell inflamed  
101 gene expression signature (16). Similarly, we assessed the correlation and prognostic  
102 independence between the NK cells and Stroma score. Given the low correlation between the NK  
103 cell and Stroma score as well as the opposite prognostic effect, we defined a TME-based risk  
104 score as the ratio of Stroma score to NK cell abundance, of which a higher value indicates an  
105 elevated risk of death.

106 Using the same formula, we constructed the Stroma score and the TME risk score for the  
107 independent GEP and IHC validation cohorts. Again, for the two GEP validation cohorts, the  
108 Stroma and TME risk score were derived based on the absolute abundance level of NK,  
109 endothelial cells and fibroblast, which were estimated by MCPcounter algorithm. For the IHC  
110 cohorts, the Stroma and TME risk score were constructed based on the IHC staining levels of  
111 CD57 (NK cell), CD34 (endothelial cell) and  $\alpha$ -SMA (fibroblast). By applying a bivariate Cox  
112 regression, we confirmed the prognostic independence between the NK cells and Stroma score  
113 in the merged validation GEP (GSE84437 and GSE15459) and IHC cohorts, respectively. Then,  
114 we tested the association between the continuous TME risk score and OS in each of the  
115 independent GEP and IHC validation cohorts. TCGA STAD cohort was excluded for survival  
116 analysis because of a short follow-up time (median: <2 years vs. >5 years in other cohorts).

117 Additionally, cutoff values for TME risk scores were derived separately for the gene expression  
118 and IHC cohorts, given the different measurement platforms. For gene expression cohorts, 100  
119 quantile cut points were generated covering the 10th percentile to 90th percentile of the TME risk  
120 score in the ACRG cohort. We dichotomized patients in the ACRG cohort based on each cut point  
121 and recorded the corresponding Wald test *P* value of Cox regression with stage and treatment  
122 controlled as strata. We chose the cutoff value with the minimum *P* value as the optimal prognostic  
123 threshold to differentiate patients into high or low TME risk groups. We used the same criteria to  
124 select the cutoff value for the IHC cohort based on the SMU1 cohort. Then, we examined the OS  
125 differences between different TME risk groups in each of the GEP and IHC cohorts.

## 126 **Independent prognostic effect of TME risk score to clinicopathologic factors**

127 We used multivariable Cox regression to assess the independent prognostic value of the  
128 continuous TME risk score by adjusting for clinicopathologic factors including age at diagnosis,  
129 gender, pathological stage, Lauren histology, and treatment by chemotherapy in the ACRG and  
130 merged IHC cohort. In the GEP cohorts, in addition to clinicopathologic factors, the inferred MSI  
131 status (1, 17) was also included in the multivariate Cox regression. To assess the statistical  
132 significance of additive prognostic effect of TME risk score to stage, which was the strongest

133 prognostic clinical factor, we compared Cox regression models that included stage with or without  
134 the continuous TME risk score based on the likelihood-ratio test for nested models. The strength  
135 of the additive effect of the continuous TME risk score to pathological stage was assessed by  
136 continuous net reclassification index analyses (package survIDINRI) (18) at 5 years.

137 We also examined the prognostic effect of the TME risk groups in relatively more homogenous  
138 sub-populations. Since the ACRG, GSE15459 and all IHC cohorts provide the patient-level stage  
139 information, we assessed the OS difference between different TME risk groups in the merged  
140 GEP (ACRG and GSE15459) and merged IHC cohorts. Similarly, since the ACRG and three IHC  
141 cohorts provide patient-level treatment information, we also examined the prognostic effect of  
142 TME risk groups in the patients who only received surgery.

### 143 **Identification of TME subtypes and genomic correlates**

144 To elucidate the molecular underpinnings among tumors with different TME characteristics, we  
145 stratified patients based on the median levels of NK cells and Stroma score of the merged GEP  
146 cohort. This led to four TME subtypes, namely NK low & Stroma low, NK high & Stroma low, NK  
147 low & Stroma high, and NK high & Stroma high. Similarly, TME subtypes in the IHC cohorts were  
148 defined based on the median levels of the NK cells and Stroma score of the merged IHC cohort.  
149 We assessed the survival differences among the TME subtypes in the merged GEP (except  
150 TCGA STAD) and merged IHC cohorts.

151 We compared our TME subtypes with the molecular subtypes proposed by the ACRG (ACRG  
152 subtype) and the intrinsic subtypes for gastric cancer (19) in the GEP cohorts. To evaluate the  
153 complementary prognostic effect of our TME subtypes to the ACRG subtypes, we examined the  
154 survival differences among TME subtypes within each individual ACRG subtype in the merged  
155 GEP cohort (except TCGA STAD). Since the ACRG subtyping was only available for patients in  
156 the ACRG cohort, we generated the ACRG subtype labels for the remaining 3 cohorts (1). Briefly,  
157 we generated the signature scores for microsatellite instability (MSI), epithelial-to-mesenchymal  
158 transition (EMT) and TP53 activity by averaging the expression levels of genes in the  
159 corresponding signature gene list. The cutoff values for MSI, EMT and TP53 activity were  
160 computed by maximizing the Youden index in the ACRG cohort (package OptimalCutpoints (20)).  
161 Then, the patients without the ACRG subtype annotation were assigned to appropriate ACRG  
162 subtypes based on these derived cutoff values. We also constructed the intrinsic subtypes for  
163 gastric cancer based on the expression level of 171 genes (19) using the nearest template  
164 prediction algorithm (21).

165 In the TCGA STAD cohort, we assessed the genomic characteristics of patients in different TME  
166 subtypes. These genomic features can be grouped into 4 major categories: 1) the genomic  
167 subtypes designed for gastrointestinal tract adenocarcinomas (GIACs); 2) status for key driver  
168 genes (the mutation status of *TP53* and *PIK3CA*, *HER2* amplification status, and the epigenetic  
169 silencing status of *CDKN2A*, *MLH1*, *BRCA1* and *RAD51C*); 3) genome instability measurement  
170 (aneuploidy score, ploidy level, whole genome doubling status [WGD], clonal deletion score [CDS],  
171 the number of homozygous deletions, the number of arm level copy number events, the number  
172 of focal amplification copy number events, the number of focal deletion copy number events, the  
173 number of overall focal copy number events and the chromosomal instability [CIN] Focal vs Broad  
174 classification); and 4) mutational burden (SNV density, indel density, overall mutation density, and  
175 hypermutation status). Chi-squared and Mann-Whitney tests were used to assess the difference  
176 between TME subgroups regarding categorical and continuous features, respectively. The

177 Benjamini-Hochberg method was used to compute the false discovery rate (FDR) to adjust for  
178 multiple testing.

179 The following is a brief description of the molecular features used in this study. The molecular  
180 subtype for GIACs (GIAC subtype) stratify patients of the TCGA STAD cohort into five groups,  
181 namely Epstein-Barr virus-positive (EBV), hypermutated-SNV (HM-SNV), MSI, CIN and genome  
182 stable (GS) subtypes (22). Mutation status for *TP53* and *PIK3CA* were derived from the MC3  
183 mutation annotation file. *HER2* amplification status was derived from the gene-level copy number  
184 data. The epigenetic silencing status of *CDKN2A*, *MLH1*, *BRCA1*, and *RAD51C*, which indicates  
185 a hyper-methylated promoter region and a reduced gene expression level, was inferred from the  
186 matched DNA methylation and gene expression profiles. The aneuploidy score, ploidy level, WGD,  
187 CDS, and the number of homozygous deletions were estimated using the ABSOLUTE algorithm.  
188 The aneuploidy scores were calculated as the sum total of amplified or deleted arms (23). The  
189 ploidy level reflects the distribution of total copy number. The presence of WGD was determined  
190 based on whether the fraction of genome with duplicated alleles was higher than 0.5. The CDS  
191 quantifies the number of clonally deleted genomic regions in each tumor's genome. Other copy  
192 number alterations were identified from segmented data using GISTIC 2.0 algorithm. The CIN  
193 Focal classification represents a higher quantity and intensity of high-amplitude focal DNA  
194 amplifications relative to the CIN Broad classification. The mutation density was defined as the  
195 number of corresponding mutations per megabase. The hypermutation was defined as mutation  
196 density larger than 10. More details about these molecular features can be found in (22).  
197 Molecular features with  $FDR < 0.01$  were reported. To excluding confounding effects of the MSI  
198 or EBV status, similar analyses were conducted in the subgroup of patients with CIN in the TCGA  
199 cohort. Similar analyses were conducted on the subgroups of patients with the same MSI (1, 17)  
200 or T-cell inflamed signatures (16).

## 201 **Identification of gene expression, molecular pathways, and cytokines correlated with NK** 202 **cell abundance and stroma score**

203 We assessed the Pearson correlation between the expression levels of each individual gene with  
204 the NK cell abundance in a meta-analysis of the four GEP cohorts. Specifically, we included genes  
205 measured by at least two cohorts and removed the marker genes of NK cells in the MCPcounter  
206 algorithm, which led to 21,616 unique genes. To minimize false positive findings, we summarized  
207 the overall correlation strength over multiple cohorts for a certain gene using a fixed-effect model  
208 based on Fisher's z transformation of correlation (Package meta (24)).

209 Next, we computed the pathway activity score of the 50 hallmark gene sets (MsigDB) for each  
210 patient in the GEP cohorts, using the single sample Gene Set Enrichment Analysis (ssGSEA)  
211 algorithm (package GSVA) (25). The correlation between pathway activity and NK cell abundance  
212 as well as Stroma score were assessed with a similar meta-analysis framework described above.

213 Soluble factors such as cytokines are key modulating factors of TME. Thus, we analyzed the  
214 differentially expressed (DE) cytokines according to the status of NK cells and Stroma score. We  
215 focused on 171 cytokine genes in the human cytokine-cytokine receptor interaction pathway  
216 (has:04060) of the KEGG database, out of which 110 cytokine genes were measured by all the  
217 GEP platforms. We used the limma (26) package to calculate the significant DE cytokine genes  
218 in the merged GEP cohort based on the NK cell and Stroma status. Genes with  $FDR < 0.01$  and  
219 fold change  $> 1.5$  were defined as the DE cytokines.  
220

221 **References:**

- 222 1. Cristescu R, Lee J, Nebozhyn M, Kim KM, Ting JC, Wong SS, et al. Molecular analysis of gastric  
223 cancer identifies subtypes associated with distinct clinical outcomes. *Nat Med*.  
224 2015;21(5):449-56.
- 225 2. Ooi CH, Ivanova T, Wu J, Lee M, Tan IB, Tao J, et al. Oncogenic pathway combinations predict  
226 clinical prognosis in gastric cancer. *Plos Genet*. 2009;5(10):e1000676.
- 227 3. Cheong J-H, Yang H-K, Kim H, Kim WH, Kim Y-W, Kook M-C, et al. Predictive test for  
228 chemotherapy response in resectable gastric cancer: a multi-cohort, retrospective analysis.  
229 *The Lancet Oncology*. 2018.
- 230 4. Dai M, Wang P, Boyd AD, Kostov G, Athey B, Jones EG, et al. Evolving gene/transcript  
231 definitions significantly alter the interpretation of GeneChip data. *Nucleic Acids Res*.  
232 2005;33(20):e175.
- 233 5. Davis S, and Meltzer PS. GEOquery: a bridge between the Gene Expression Omnibus (GEO)  
234 and BioConductor. *Bioinformatics*. 2007;23(14):1846-7.
- 235 6. Miller JA, Cai C, Langfelder P, Geschwind DH, Kurian SM, Salomon DR, et al. Strategies for  
236 aggregating gene expression data: the collapseRows R function. *BMC Bioinformatics*.  
237 2011;12:322.
- 238 7. Johnson WE, Li C, and Rabinovic A. Adjusting batch effects in microarray expression data  
239 using empirical Bayes methods. *Biostatistics*. 2007;8(1):118-27.
- 240 8. Jiang Y, Zhang Q, Hu Y, Li T, Yu J, Zhao L, et al. ImmunoScore Signature: A Prognostic and  
241 Predictive Tool in Gastric Cancer. *Ann Surg*. 2018;267(3):504-13.
- 242 9. Jiang Y, Xie J, Han Z, Liu W, Xi S, Huang L, et al. Immunomarker Support Vector Machine  
243 Classifier for Prediction of Gastric Cancer Survival and Adjuvant Chemotherapeutic Benefit.  
244 *Clin Cancer Res*. 2018;24(22):5574-84.
- 245 10. Becht E, Giraldo NA, Lacroix L, Buttard B, Elarouci N, Petitprez F, et al. Estimating the  
246 population abundance of tissue-infiltrating immune and stromal cell populations using gene  
247 expression. *Genome Biol*. 2016;17(1):218.
- 248 11. Ishwaran H, Kogalur UB, Blackstone EH, and Lauer MS. Random survival forests. *The annals  
249 of applied statistics*. 2008;2(3):841-60.
- 250 12. Rooney MS, Shukla SA, Wu CJ, Getz G, and Hacohen N. Molecular and genetic properties of  
251 tumors associated with local immune cytolytic activity. *Cell*. 2015;160(1):48-61.
- 252 13. Loboda A, Nebozhyn MV, Watters JW, Buser CA, Shaw PM, Huang PS, et al. EMT is the  
253 dominant program in human colon cancer. *BMC medical genomics*. 2011;4(1):9.
- 254 14. Elyada E, Bolisetty M, Laise P, Flynn WF, Courtois ET, Burkhart RA, et al. Cross-Species  
255 Single-Cell Analysis of Pancreatic Ductal Adenocarcinoma Reveals Antigen-Presenting  
256 Cancer-Associated Fibroblasts. *Cancer Discov*. 2019;9(8):1102-23.
- 257 15. Yoshihara K, Shahmoradgoli M, Martinez E, Vegesna R, Kim H, Torres-Garcia W, et al.  
258 Inferring tumour purity and stromal and immune cell admixture from expression data.  
259 *Nature communications*. 2013;4:2612.
- 260 16. Cristescu R, Mogg R, Ayers M, Albright A, Murphy E, Yearley J, et al. Pan-tumor genomic  
261 biomarkers for PD-1 checkpoint blockade-based immunotherapy. *Science*. 2018;362(6411).
- 262 17. Cancer Genome Atlas N. Comprehensive molecular characterization of human colon and  
263 rectal cancer. *Nature*. 2012;487(7407):330-7.
- 264 18. Pencina MJ, D'Agostino Sr RB, and Steyerberg EW. Extensions of net reclassification  
265 improvement calculations to measure usefulness of new biomarkers. *Statistics in medicine*.  
266 2011;30(1):11-21.
- 267 19. Tan IB, Ivanova T, Lim KH, Ong CW, Deng N, Lee J, et al. Intrinsic subtypes of gastric cancer,  
268 based on gene expression pattern, predict survival and respond differently to  
269 chemotherapy. *Gastroenterology*. 2011;141(2):476-85, 85 e1-11.

270 20. López-Ratón M, Rodríguez-Álvarez MX, Cadarso-Suárez C, and Gude-Sampedro F.  
271 OptimalCutpoints: an R package for selecting optimal cutpoints in diagnostic tests. *J Stat*  
272 *Softw.* 2014;61(8):1-36.

273 21. Hoshida Y. Nearest template prediction: a single-sample-based flexible class prediction with  
274 confidence assessment. *PloS one.* 2010;5(11).

275 22. Liu Y, Sethi NS, Hinoue T, Schneider BG, Cherniack AD, Sanchez-Vega F, et al. Comparative  
276 Molecular Analysis of Gastrointestinal Adenocarcinomas. *Cancer cell.* 2018;33(4):721-35 e8.

277 23. Thorsson V, Gibbs DL, Brown SD, Wolf D, Bortone DS, Ou Yang TH, et al. The Immune  
278 Landscape of Cancer. *Immunity.* 2018;48(4):812-30 e14.

279 24. Schwarzer G. meta: An R package for meta-analysis. *R news.* 2007;7(3):40-5.

280 25. Hänzelmann S, Castelo R, and Guinney J. GSVA: gene set variation analysis for microarray  
281 and RNA-seq data. *BMC bioinformatics.* 2013;14(1):7.

282 26. Ritchie ME, Phipson B, Wu D, Hu Y, Law CW, Shi W, et al. limma powers differential  
283 expression analyses for RNA-sequencing and microarray studies. *Nucleic acids research.*  
284 2015;43(7):e47-e.

285

286 **Supplementary Tables**287 **Table S1. Marker genes to calculate absolute abundance levels of TME cell types**

| Gene symbols         | Cell population         | ENTREZID     | Gene symbols          | Cell population          | ENTREZID      |
|----------------------|-------------------------|--------------|-----------------------|--------------------------|---------------|
| <i>CD28</i>          | T cells                 | 940          | <i>BANK1</i>          | B lineage                | 55024         |
| <i>CD3D</i>          | T cells                 | 915          | <i>CD19</i>           | B lineage                | 930           |
| <i>CD3G</i>          | T cells                 | 917          | <i>CD22</i>           | B lineage                | 933           |
| <i>CD5</i>           | T cells                 | 921          | <i>CD79A</i>          | B lineage                | 973           |
| <i>CD6</i>           | T cells                 | 923          | <i>CR2</i>            | B lineage                | 1380          |
| <i>CHRM3-AS2</i>     | T cells                 | 100506915    | <i>FCRL2</i>          | B lineage                | 79368         |
| <i>CTLA4</i>         | T cells                 | 1493         | <i>IGKC</i>           | B lineage                | 3514          |
| <i>FLT3LG</i>        | T cells                 | 2323         | <i>MS4A1</i>          | B lineage                | 931           |
| <i>ICOS</i>          | T cells                 | 29851        | <i>PAX5</i>           | B lineage                | 5079          |
| <i>MAL</i>           | T cells                 | 4118         | <b><i>CD160</i></b>   | <b>NK cells</b>          | <b>11126</b>  |
| <i>MGC40069</i>      | T cells                 | 348035       | <b><i>KIR2DL1</i></b> | <b>NK cells</b>          | <b>3802</b>   |
| <i>PBX4</i>          | T cells                 | 80714        | <b><i>KIR2DL3</i></b> | <b>NK cells</b>          | <b>3804</b>   |
| <i>SIRPG</i>         | T cells                 | 55423        | <b><i>KIR2DL4</i></b> | <b>NK cells</b>          | <b>3805</b>   |
| <i>THEMIS</i>        | T cells                 | 387357       | <b><i>KIR3DL1</i></b> | <b>NK cells</b>          | <b>3811</b>   |
| <i>TNFRSF25</i>      | T cells                 | 8718         | <b><i>KIR3DS1</i></b> | <b>NK cells</b>          | <b>3813</b>   |
| <i>TRAT1</i>         | T cells                 | 50852        | <b><i>NCR1</i></b>    | <b>NK cells</b>          | <b>9437</b>   |
| <i>CD8B</i>          | CD8 T cells             | 926          | <b><i>PTGDR</i></b>   | <b>NK cells</b>          | <b>5729</b>   |
| <i>CD8A</i>          | Cytotoxic lymphocytes   | 925          | <b><i>SH2D1B</i></b>  | <b>NK cells</b>          | <b>117157</b> |
| <i>EOMES</i>         | Cytotoxic lymphocytes   | 8320         | <i>ADAP2</i>          | Monocytic lineage        | 55803         |
| <i>FGFBP2</i>        | Cytotoxic lymphocytes   | 83888        | <i>CSF1R</i>          | Monocytic lineage        | 1436          |
| <i>GNLY</i>          | Cytotoxic lymphocytes   | 10578        | <i>FPR3</i>           | Monocytic lineage        | 2359          |
| <i>KLRC3</i>         | Cytotoxic lymphocytes   | 3823         | <i>KYNU</i>           | Monocytic lineage        | 8942          |
| <i>KLRC4</i>         | Cytotoxic lymphocytes   | 8302         | <i>PLA2G7</i>         | Monocytic lineage        | 7941          |
| <i>KLRD1</i>         | Cytotoxic lymphocytes   | 3824         | <i>RASSF4</i>         | Monocytic lineage        | 83937         |
| <i>CD1A</i>          | Myeloid dendritic cells | 909          | <i>TFEC</i>           | Monocytic lineage        | 22797         |
| <i>CD1B</i>          | Myeloid dendritic cells | 910          | <b><i>ACVRL1</i></b>  | <b>Endothelial cells</b> | <b>94</b>     |
| <i>CD1E</i>          | Myeloid dendritic cells | 913          | <b><i>APLN</i></b>    | <b>Endothelial cells</b> | <b>8862</b>   |
| <i>CLEC10A</i>       | Myeloid dendritic cells | 10462        | <b><i>BCL6B</i></b>   | <b>Endothelial cells</b> | <b>255877</b> |
| <i>CLIC2</i>         | Myeloid dendritic cells | 1193         | <b><i>BMP6</i></b>    | <b>Endothelial cells</b> | <b>654</b>    |
| <i>WFDC21P</i>       | Myeloid dendritic cells | 645638       | <b><i>BMX</i></b>     | <b>Endothelial cells</b> | <b>660</b>    |
| <i>CA4</i>           | Neutrophils             | 762          | <b><i>CDH5</i></b>    | <b>Endothelial cells</b> | <b>1003</b>   |
| <i>CEACAM3</i>       | Neutrophils             | 1084         | <b><i>CLEC14A</i></b> | <b>Endothelial cells</b> | <b>161198</b> |
| <i>CXCR1</i>         | Neutrophils             | 3577         | <b><i>CXorf36</i></b> | <b>Endothelial cells</b> | <b>79742</b>  |
| <i>CXCR2</i>         | Neutrophils             | 3579         | <b><i>EDN1</i></b>    | <b>Endothelial cells</b> | <b>1906</b>   |
| <i>CYP4F3</i>        | Neutrophils             | 4051         | <b><i>ELTD1</i></b>   | <b>Endothelial cells</b> | <b>64123</b>  |
| <i>FCGR3B</i>        | Neutrophils             | 2215         | <b><i>EMCN</i></b>    | <b>Endothelial cells</b> | <b>51705</b>  |
| <i>HAL</i>           | Neutrophils             | 3034         | <b><i>ESAM</i></b>    | <b>Endothelial cells</b> | <b>90952</b>  |
| <i>KCNJ15</i>        | Neutrophils             | 3772         | <b><i>ESM1</i></b>    | <b>Endothelial cells</b> | <b>11082</b>  |
| <i>MEGF9</i>         | Neutrophils             | 1955         | <b><i>FAM124B</i></b> | <b>Endothelial cells</b> | <b>79843</b>  |
| <i>SLC25A37</i>      | Neutrophils             | 51312        | <b><i>HECW2</i></b>   | <b>Endothelial cells</b> | <b>57520</b>  |
| <i>STEAP4</i>        | Neutrophils             | 79689        | <b><i>HHIP</i></b>    | <b>Endothelial cells</b> | <b>64399</b>  |
| <i>TECPR2</i>        | Neutrophils             | 9895         | <b><i>KDR</i></b>     | <b>Endothelial cells</b> | <b>3791</b>   |
| <i>TLE3</i>          | Neutrophils             | 7090         | <b><i>MMRN1</i></b>   | <b>Endothelial cells</b> | <b>22915</b>  |
| <i>TNFRSF10C</i>     | Neutrophils             | 8794         | <b><i>MMRN2</i></b>   | <b>Endothelial cells</b> | <b>79812</b>  |
| <i>VNN3</i>          | Neutrophils             | 55350        | <b><i>MYCT1</i></b>   | <b>Endothelial cells</b> | <b>80177</b>  |
| <b><i>COL1A1</i></b> | <b>Fibroblasts</b>      | <b>1277</b>  | <b><i>PALMD</i></b>   | <b>Endothelial cells</b> | <b>54873</b>  |
| <b><i>COL3A1</i></b> | <b>Fibroblasts</b>      | <b>1281</b>  | <b><i>PEAR1</i></b>   | <b>Endothelial cells</b> | <b>375033</b> |
| <b><i>COL6A1</i></b> | <b>Fibroblasts</b>      | <b>1291</b>  | <b><i>PGF</i></b>     | <b>Endothelial cells</b> | <b>5228</b>   |
| <b><i>COL6A2</i></b> | <b>Fibroblasts</b>      | <b>1292</b>  | <b><i>PLXNA2</i></b>  | <b>Endothelial cells</b> | <b>5362</b>   |
| <b><i>DCN</i></b>    | <b>Fibroblasts</b>      | <b>1634</b>  | <b><i>PTPRB</i></b>   | <b>Endothelial cells</b> | <b>5787</b>   |
| <b><i>GREM1</i></b>  | <b>Fibroblasts</b>      | <b>26585</b> | <b><i>ROBO4</i></b>   | <b>Endothelial cells</b> | <b>54538</b>  |



---

|              |             |       |               |                   |        |
|--------------|-------------|-------|---------------|-------------------|--------|
| <i>PAMR1</i> | Fibroblasts | 25891 | <i>SDPR</i>   | Endothelial cells | 8436   |
| <i>TAGLN</i> | Fibroblasts | 6876  | <i>SHANK3</i> | Endothelial cells | 85358  |
|              |             |       | <i>SHE</i>    | Endothelial cells | 126669 |
|              |             |       | <i>TEK</i>    | Endothelial cells | 7010   |
|              |             |       | <i>TIE1</i>   | Endothelial cells | 7075   |
|              |             |       | <i>VEPH1</i>  | Endothelial cells | 79674  |
|              |             |       | <i>VWF</i>    | Endothelial cells | 7450   |

---

288

289 **Table S2. Multivariable Cox regression analysis of overall survival using the TME risk**  
 290 **score, clinicopathologic factors and MSI status**

| Variables             | ACRG cohort         |                           | GSE15459             |                           | GSE84437           |                           |
|-----------------------|---------------------|---------------------------|----------------------|---------------------------|--------------------|---------------------------|
|                       | HR (95% CI)         | <i>P</i> value            | HR (95% CI)          | <i>P</i> value            | HR (95% CI)        | <i>P</i> value            |
| TME risk score        | 1.39 (1.19 - 1.63)  | 4.70×10 <sup>-5</sup> *** | 1.44 (1.14 - 1.83)   | 0.0026 **                 | 1.41 (1.21 - 1.64) | 1.20×10 <sup>-5</sup> *** |
| Age                   | 1.03 (1.01 - 1.04)  | 0.0017 **                 | 1.01 (0.99 - 1.03)   | 0.23                      | 1.02 (1.01 - 1.03) | 0.0039 **                 |
| Gender                |                     |                           |                      |                           |                    |                           |
| Female                | 1.00                | -                         | 1.00                 | -                         | 1.00               | -                         |
| Male                  | 1.23 (0.87 - 1.76)  | 0.24                      | 0.84 (0.52 - 1.36)   | 0.47                      | 1.29 (0.95 - 1.75) | 0.098                     |
| Stage                 |                     |                           |                      |                           |                    |                           |
| I                     | 1.00                | -                         | 1.00                 | -                         | -                  | -                         |
| II                    | 1.49 (0.57 - 3.89)  | 0.42                      | 2.47 (0.76 - 8.05)   | 0.13                      | -                  | -                         |
| III                   | 3.02 (1.18 - 7.79)  | 0.022 *                   | 9.10 (3.17 - 26.09)  | 4.00×10 <sup>-5</sup> *** | -                  | -                         |
| IV                    | 6.96 (2.73 - 17.74) | 4.90×10 <sup>-5</sup> *** | 23.64 (8.05 - 69.38) | 8.50×10 <sup>-9</sup> *** | -                  | -                         |
| Lauren classification |                     |                           |                      |                           |                    |                           |
| Diffuse/Mixed         | 1.00                | -                         | 1.00                 | -                         | -                  | -                         |
| Intestinal            | 0.70 (0.49 - 1.00)  | 0.049 *                   | 1.22 (0.77 - 1.92)   | 0.41                      | -                  | -                         |
| MS status             |                     |                           |                      |                           |                    |                           |
| Stable                | 1.00                | -                         | 1.00                 | -                         | 1.00               | -                         |
| Instable              | 0.75 (0.47 - 1.21)  | 0.23                      | 1.51 (0.86 - 2.66)   | 0.15                      | 1.07 (0.74 - 1.56) | 0.72                      |
| Chemotherapy          |                     |                           |                      |                           |                    |                           |
| No                    | 1.00                | -                         | -                    | -                         | -                  | -                         |
| Yes                   | 0.48 (0.34 - 0.70)  | 8.60×10 <sup>-5</sup> *** | -                    | -                         | -                  | -                         |

291

292 **Table S3. Top 20 genes positively correlated with NK cell abundance in a meta-analysis**  
 293 **of the combined GEP cohorts**

| <b>Gene symbol</b> | <b>Pearson's correlation</b> | <b>Gene name</b>                                                                       | <b>Alias</b>                                                                    |
|--------------------|------------------------------|----------------------------------------------------------------------------------------|---------------------------------------------------------------------------------|
| <i>KLRC1</i>       | 0.73                         | killer cell lectin like receptor C1                                                    | <i>CD159A, NKG2, NKG2A, KLRC1</i>                                               |
| <i>KIR3DL2</i>     | 0.69                         | killer cell immunoglobulin like receptor, three Ig domains and long cytoplasmic tail 2 | <i>3DL2, CD158K, KIR-3DL2, NKAT-4, NKAT4, NKAT4B, p140, KIR3DL2</i>             |
| <i>FASLG</i>       | 0.68                         | Fas ligand                                                                             | <i>ALPS1B, APT1LG1, APTL, CD178, CD95-L, CD95L, FASL, TNFSF6, TNLG1A, FASLG</i> |
| <i>SLA2</i>        | 0.67                         | Src like adaptor 2                                                                     | <i>C20orf156, MARS, SLAP-2, SLAP2, SLA2</i>                                     |
| <i>KLRC3</i>       | 0.66                         | killer cell lectin like receptor C3                                                    | <i>NKG2-E, NKG2E, KLRC3</i>                                                     |
| <i>PRF1</i>        | 0.66                         | perforin 1                                                                             | <i>HPLH2, P1, PFP, PRF1</i>                                                     |
| <i>KLRC2</i>       | 0.64                         | killer cell lectin like receptor C2                                                    | <i>CD159c, NKG2-C, NKG2C, KLRC2</i>                                             |
| <i>CD244</i>       | 0.63                         | CD244 molecule                                                                         | <i>2B4, NAIL, NKR2B4, Nmrk, SLAMF4, CD244</i>                                   |
| <i>GZMA</i>        | 0.63                         | granzyme A                                                                             | <i>CTLA3, HFSP, GZMA</i>                                                        |
| <i>TARP</i>        | 0.62                         | TCR gamma alternate reading frame protein                                              | <i>CD3G, TCRG, TCRGC1, TCRGC2, TCRGV, TARP</i>                                  |
| <i>IFNG</i>        | 0.62                         | interferon gamma                                                                       | <i>IFG, IFI, IFNG</i>                                                           |
| <i>APOBEC3H</i>    | 0.62                         | apolipoprotein B mRNA editing enzyme catalytic subunit 3H                              | <i>A3H, ARP-10, ARP10, APOBEC3H</i>                                             |
| <i>KLRD1</i>       | 0.61                         | killer cell lectin like receptor D1                                                    | <i>CD94, KLRD1</i>                                                              |
| <i>GBP5</i>        | 0.61                         | guanylate binding protein 5                                                            | <i>GBP-5, GBP5</i>                                                              |
| <i>IL12RB1</i>     | 0.60                         | interleukin 12 receptor subunit beta 1                                                 | <i>CD212, IL-12R-BETA1, IL12RB, IMD30, IL12RB1</i>                              |
| <i>ZNF683</i>      | 0.60                         | zinc finger protein 683                                                                | <i>Hobit, ZNF683</i>                                                            |
| <i>GZMB</i>        | 0.60                         | granzyme B                                                                             | <i>C11, CCPI, CGL-1, CGL1, CSP-B, CSPB, CTLA1, CTSG1, HLP, SECT, GZMB</i>       |
| <i>GNLY</i>        | 0.59                         | granulysin                                                                             | <i>D2S69E, LAG-2, LAG2, NKG5, TLA519, GNLY</i>                                  |
| <i>LAG3</i>        | 0.59                         | lymphocyte activating 3                                                                | <i>CD223, LAG3</i>                                                              |

294

295 **Table S4. Top pathways correlated with NK cell abundance or Stroma score in a meta-**  
 296 **analysis of the combined GEP cohorts**  
 297

| Pathways positively correlated with NK cell abundance |       |                                   | Pathways positively correlated with stroma score |       |                                   |
|-------------------------------------------------------|-------|-----------------------------------|--------------------------------------------------|-------|-----------------------------------|
| Rank                                                  | r     | Pathways                          | Rank                                             | r     | Pathways                          |
| 1                                                     | 0.52  | INTERFERON_GAMMA_RESPONSE         | 1                                                | 0.91  | EPITHELIAL_MESENCHYMAL_TRANSITION |
| 2                                                     | 0.51  | ALLOGRAFT_REJECTION               | 2                                                | 0.85  | UV_RESPONSE_DN                    |
| 3                                                     | 0.48  | INTERFERON_ALPHA_RESPONSE         | 3                                                | 0.84  | APICAL_JUNCTION                   |
| 4                                                     | 0.44  | IL6_JAK_STAT3_SIGNALING           | 4                                                | 0.83  | MYOGENESIS                        |
| 5                                                     | 0.40  | COMPLEMENT                        | 5                                                | 0.76  | ANGIOGENESIS                      |
| 6                                                     | 0.38  | INFLAMMATORY_RESPONSE             | 6                                                | 0.73  | KRAS_SIGNALING_UP                 |
| 7                                                     | 0.33  | PI3K_AKT_MTOR_SIGNALING           | 7                                                | 0.68  | COAGULATION                       |
| 8                                                     | 0.29  | APOPTOSIS                         | 8                                                | 0.65  | HYPOXIA                           |
| 9                                                     | 0.29  | IL2_STAT5_SIGNALING               | 9                                                | 0.62  | IL2_STAT5_SIGNALING               |
| 10                                                    | 0.29  | TNFA_SIGNALING_VIA_NFKB           | 10                                               | 0.62  | TGF_BETA_SIGNALING                |
| Pathways negatively correlated with NK cell abundance |       |                                   | Pathways positively correlated with stroma score |       |                                   |
| Rank                                                  | r     | Pathways                          | Rank                                             | r     | Pathways                          |
| 1                                                     | -0.28 | HEDGEHOG_SIGNALING                | 1                                                | -0.61 | E2F_TARGETS                       |
| 2                                                     | -0.27 | MYOGENESIS                        | 2                                                | -0.61 | MYC_TARGETS_V2                    |
| 3                                                     | -0.24 | WNT_BETA_CATENIN_SIGNALING        | 3                                                | -0.59 | G2M_CHECKPOINT                    |
| 4                                                     | -0.20 | UV_RESPONSE_DN                    | 4                                                | -0.56 | DNA_REPAIR                        |
| 5                                                     | -0.20 | ADIPOGENESIS                      | 5                                                | -0.55 | MYC_TARGETS_V1                    |
| 6                                                     | -0.20 | BILE_ACID_METABOLISM              | 6                                                | -0.51 | SPERMATOGENESIS                   |
| 7                                                     | -0.19 | NOTCH_SIGNALING                   | 7                                                | -0.40 | UNFOLDED_PROTEIN_RESPONSE         |
| 8                                                     | -0.18 | PANCREAS_BETA_CELLS               | 8                                                | -0.38 | MTORC1_SIGNALING                  |
| 9                                                     | -0.14 | TGF_BETA_SIGNALING                | 9                                                | -0.37 | OXIDATIVE_PHOSPHORYLATION         |
| 10                                                    | -0.13 | EPITHELIAL_MESENCHYMAL_TRANSITION | 10                                               | -0.33 | PEROXISOME                        |

298

299 **Supplementary Figures**

300 **Figure S1. The workflow of this study.**

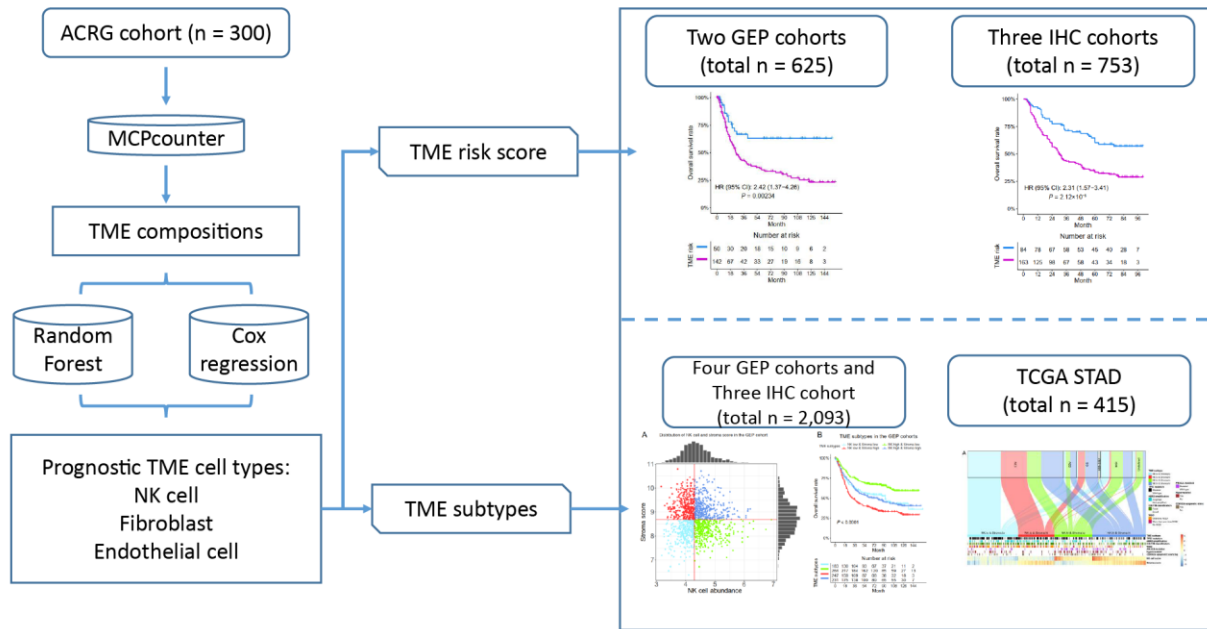

301

302

303 **Figure S2. Prognostic effects of the major cellular components of the TME and their**  
 304 **pairwise correlation in the ACRG discovery cohort** (A) Univariate Cox regression analysis  
 305 revealed that the absolute abundance levels of NK cells, fibroblasts, and endothelial cells were  
 306 prognostic of overall survival with a pre-specified statistical significance  $P < 0.05$ . (B) Univariate  
 307 Cox regression analysis with stage and chemotherapy adjusted revealed that the absolute  
 308 abundance levels of NK cells, endothelial cells, and fibroblasts were prognostic of overall survival  
 309 with a pre-specified statistical significance  $P < 0.05$ . (C) The abundance levels of NK cells,  
 310 fibroblasts and endothelial cells were the most important features in the random survival forest  
 311 model for predicting overall survival. Turquoise color corresponds to positive feature importance  
 312 and coral color corresponds to negative features importance. (D) Endothelial cells, fibroblasts,  
 313 and the stroma score were all highly correlated with each other. By contrast, NK cells were  
 314 uncorrelated to endothelial cells, fibroblasts, and the stroma score. Hazard ratios (HR),  
 315 confidence intervals (CI) and  $P$  values in A and B were estimated by Cox regression.

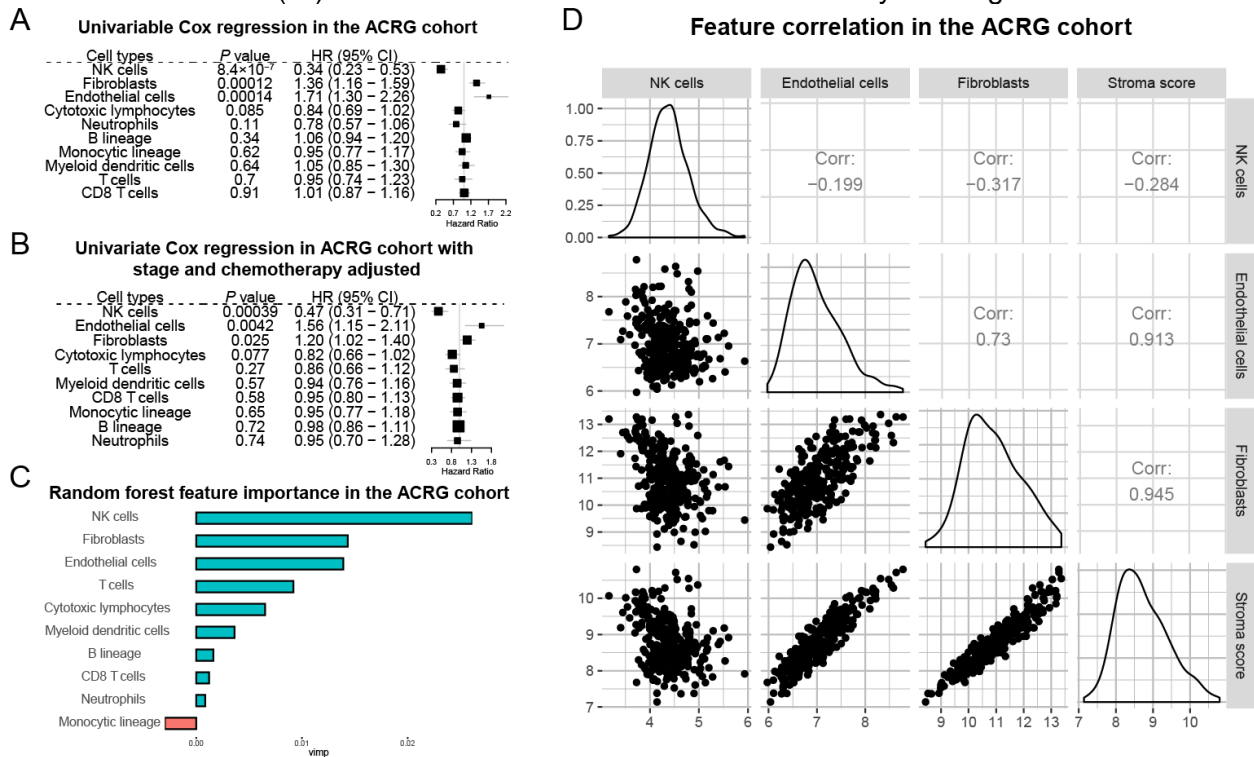

316

317 **Figure S3. Correlation of NK cells or stroma scores with T cells and other gene signatures**

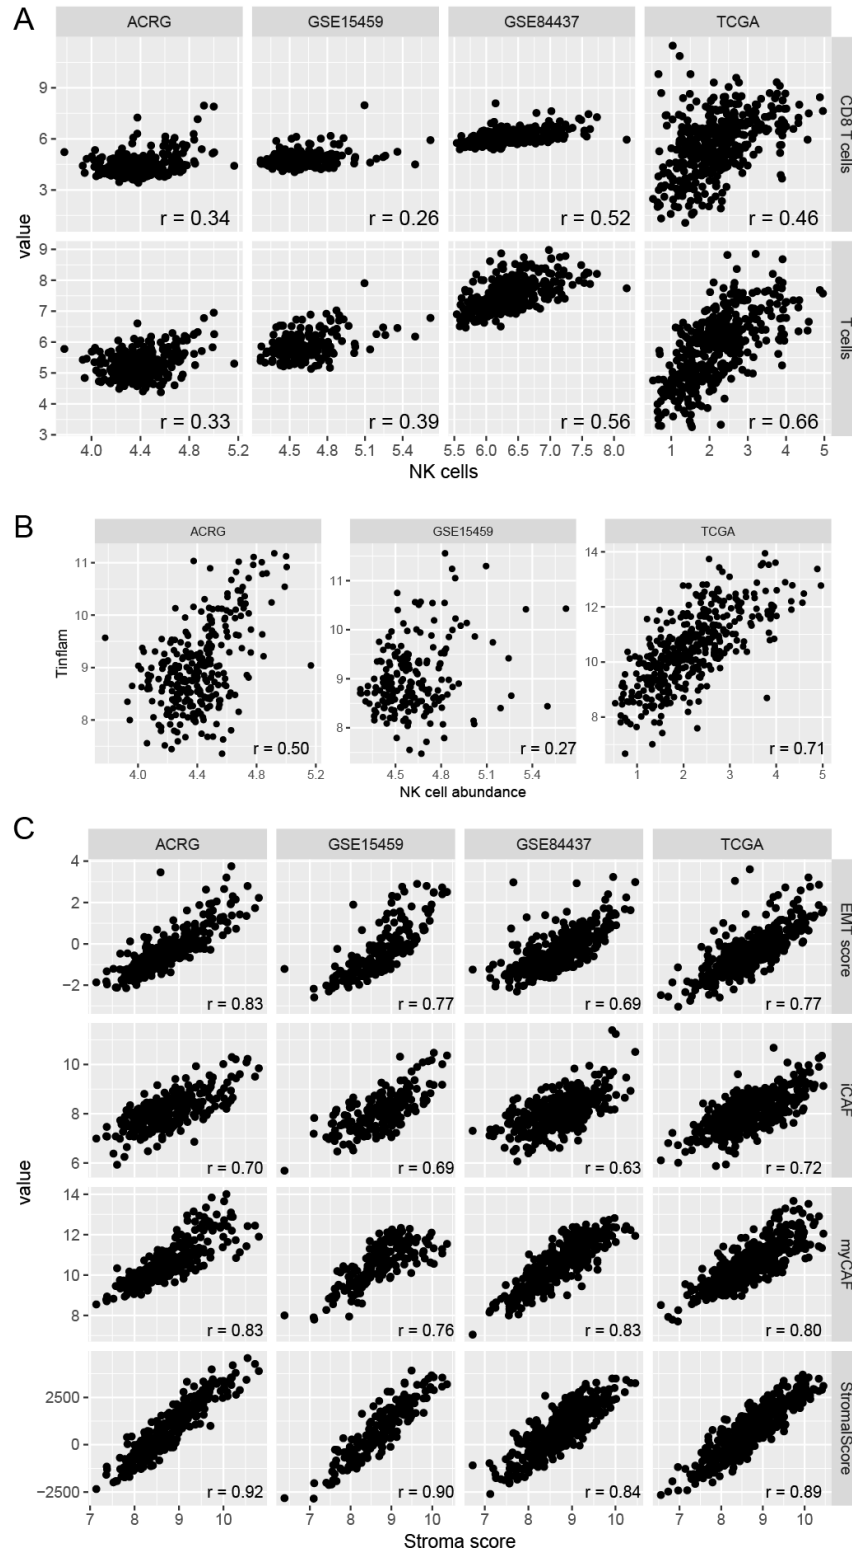

318  
319

320 **Figures S4. Bivariate Cox regression on the merged GEP and IHC cohorts.** Bivariate Cox  
 321 regression indicated that NK cell abundance and stroma score were independent prognostic  
 322 factors in the merged GEP validation cohorts (GSE15459 and GSE84437) (A) and merged IHC  
 323 validation cohorts (B). Hazard ratios (HR), confidence interval (CI) and *P* values were estimated  
 324 by Cox regression.  
 325  
 326

**A Bivariate Cox regression in merged validation GEP cohort**

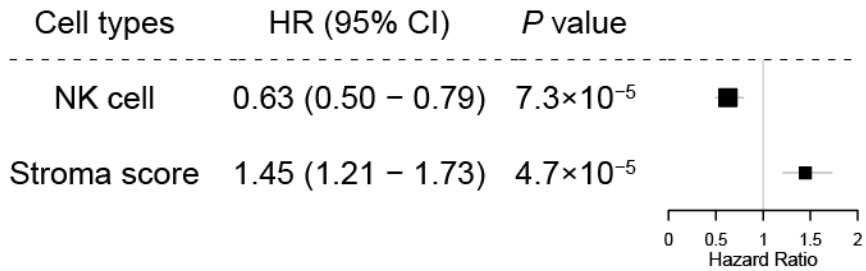

**B Bivariate Cox regression in merged validation IHC cohort**

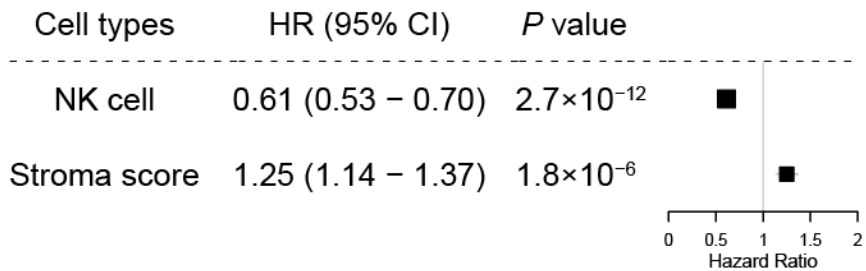

327



328 **Figure S5. Cox regression  $P$  values at different cutoffs of the TME risk score.** (A) The TME  
329 risk score of 1.78 (vertical red line) was chosen as the cutoff for GEP cohorts, based on the  
330 minimal Cox regression  $P$  value in the ACRG cohort. (B) The TME risk score of 0.59 (vertical  
331 red line) was chosen as the cutoff for IHC cohorts, based on the minimal Cox regression  $P$   
332 value in the SMU1 cohort.  
333

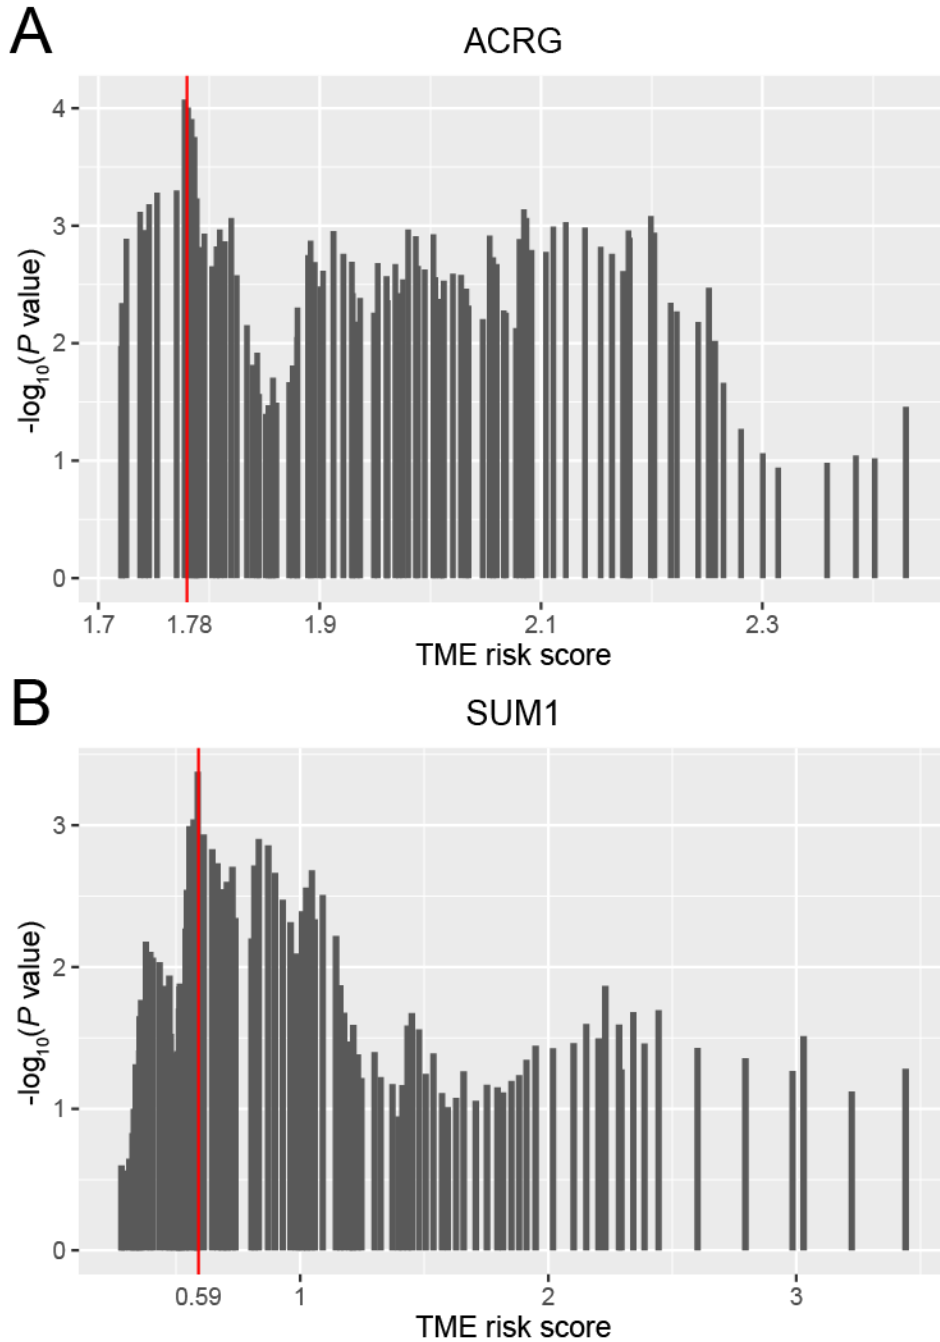

334

335 **Figures S6. The prognostic effects of the TME risk score in patients within each**  
 336 **pathological stage in the combined GEP cohorts.** A high TME risk score was consistently  
 337 associated with worse overall survival in patients with stage I (A), stage II (B), stage III (C), and  
 338 stage IV (D) GC in the merged GEP cohorts (ACRG and GSE15459). Hazard ratios (HR) and  
 339 confidence intervals (CI) were estimated by Cox regression. *P* values were generated by log-rank  
 340 test.

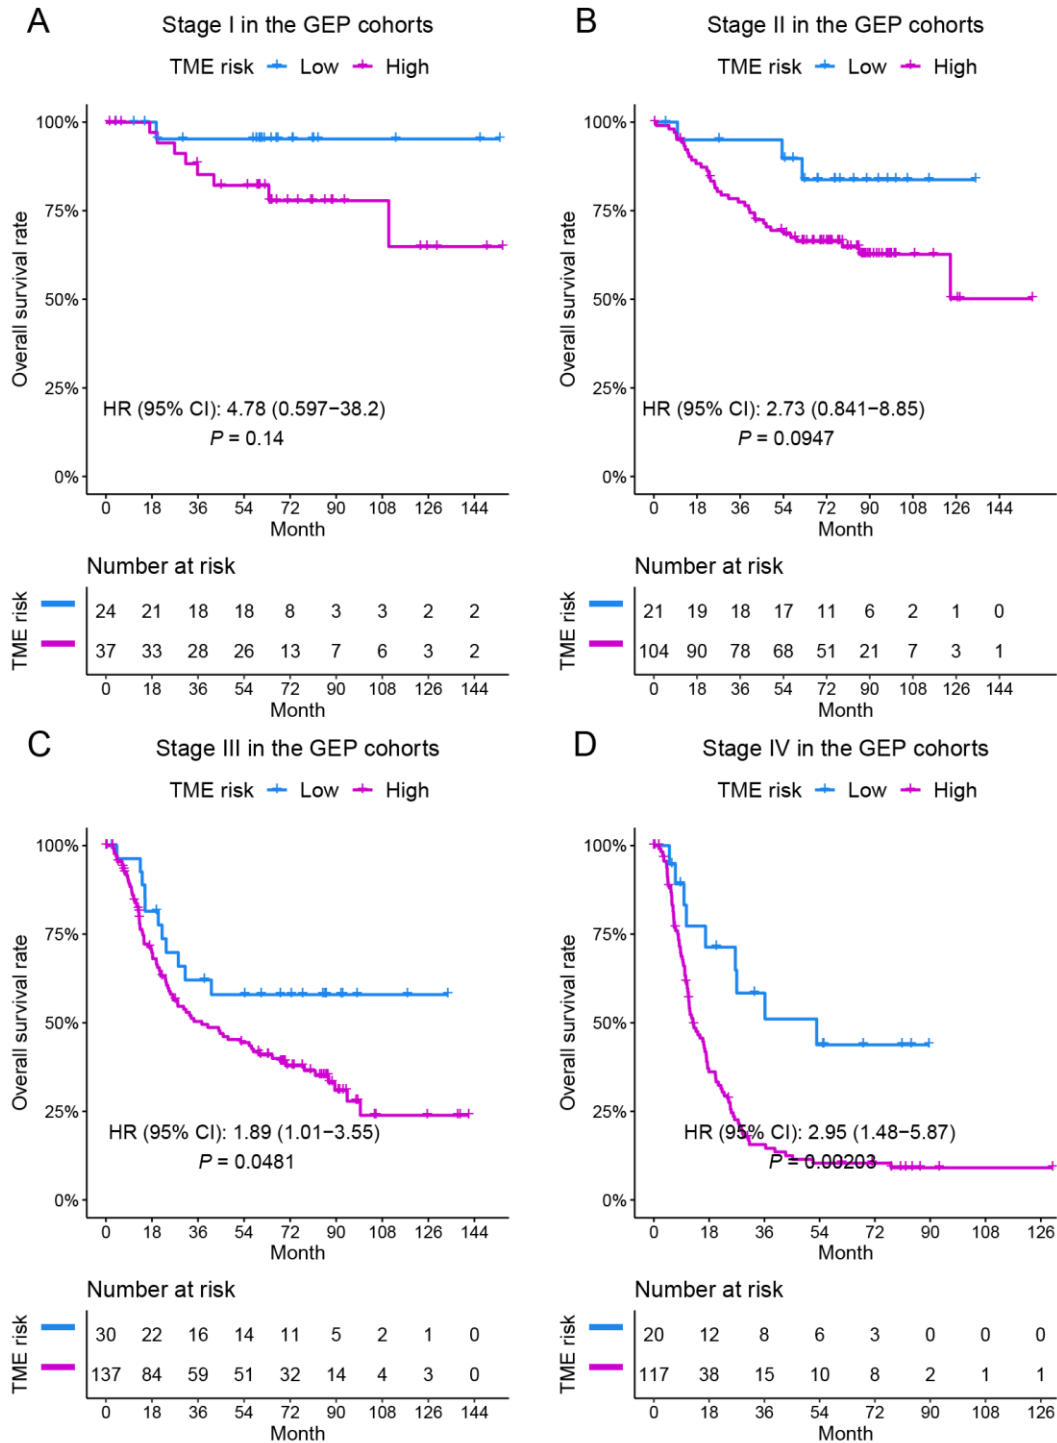

341

342 **Figure S7. The prognostic effect of the TME risk score in patients treated with surgery only**  
 343 **and without chemotherapy.** A high TME risk score was associated with worse overall survival  
 344 in patients who received surgery alone in the ACRG (A), SMU1 (B), SMU2 (C), and SYSU (D)  
 345 cohorts. HR and confidence intervals were estimated by Cox regression. *P* values were generated  
 346 by log-rank test.  
 347

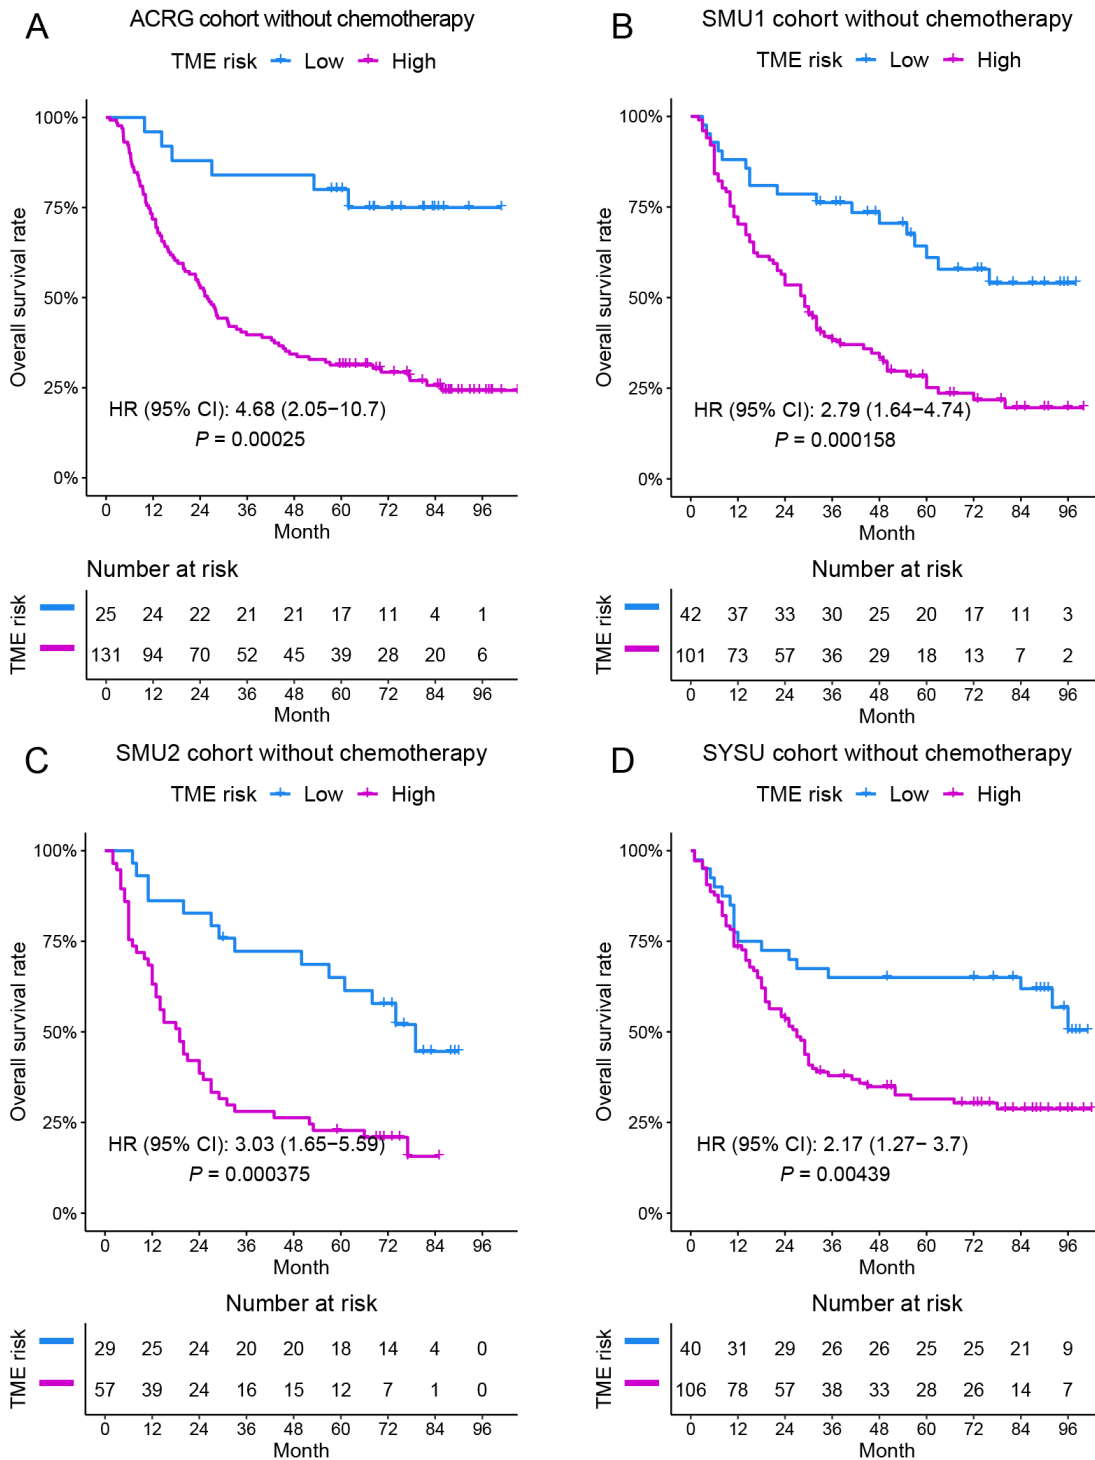

349 **Figure S8. Predictive relevance of the TME risk score for the benefit of chemotherapy in**  
 350 **unmatched stage I-III gastric cancer.** (A) Patients with a high TME risk score derived a  
 351 significant survival benefit from adjuvant chemotherapy at 5 years. However, patients with a low  
 352 TME risk score did not benefit from adjuvant chemotherapy (B). Hazard ratios (HR) and  
 353 confidence intervals (CI) were estimated by Cox regression. *P* values were generated by log-rank  
 354 test. The *P* value for the interaction between the TME risk group and adjuvant chemotherapy was  
 355 0.0965.  
 356

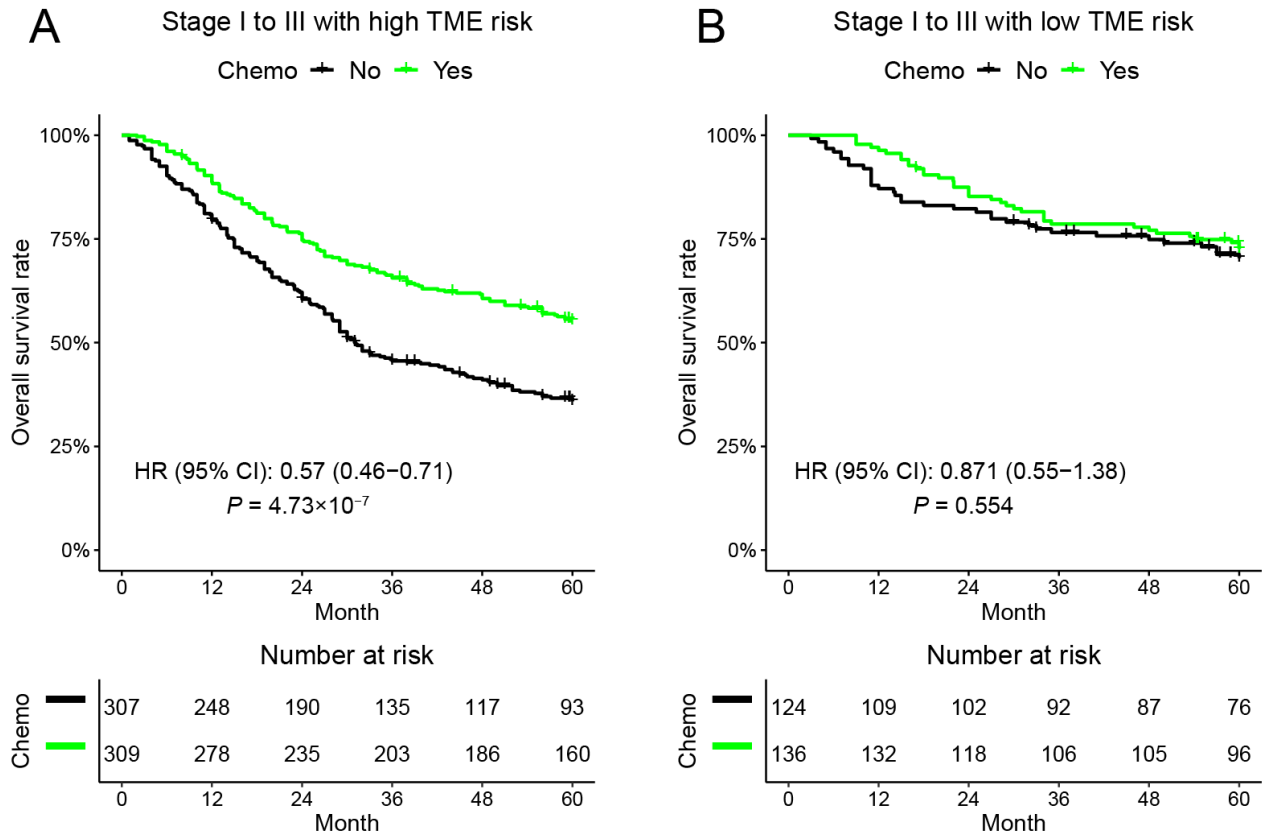

357

358

359 **Figure S9. Complementary prognostic value of the TME subtypes to the intrinsic subtypes**  
 360 **for gastric cancer. P values were generated by log-rank test.**

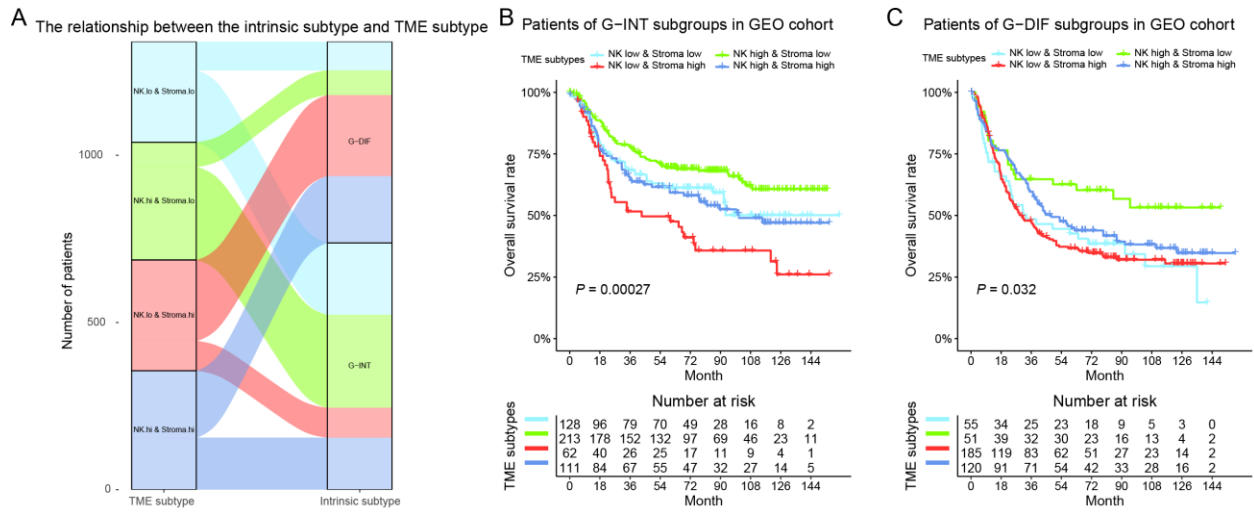

361

362 **Figure S10. Genomic features significantly associated with NK cell infiltration status.**

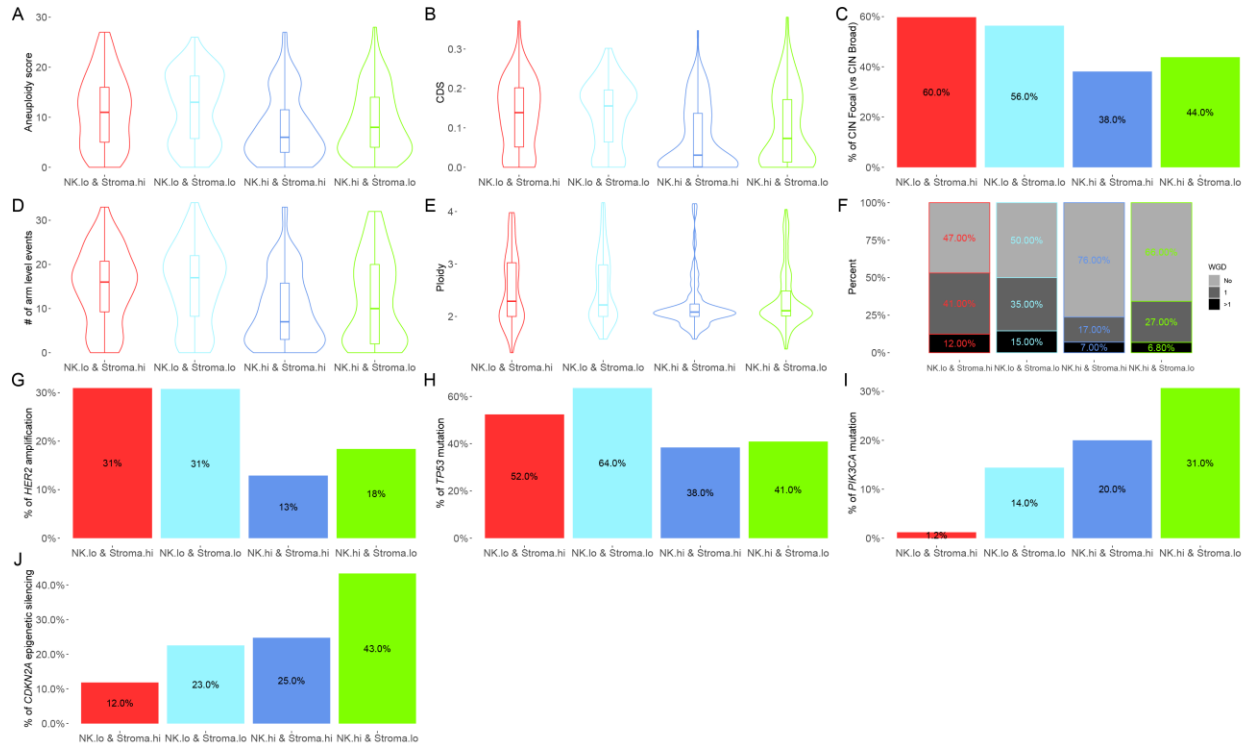

363

364

365  
366

**Figure S11. Differential mutation status of TP53 and PIK3CA in patients with different MSI or T-cell inflamed levels.** *P* values were generated by Chi-squared tests.

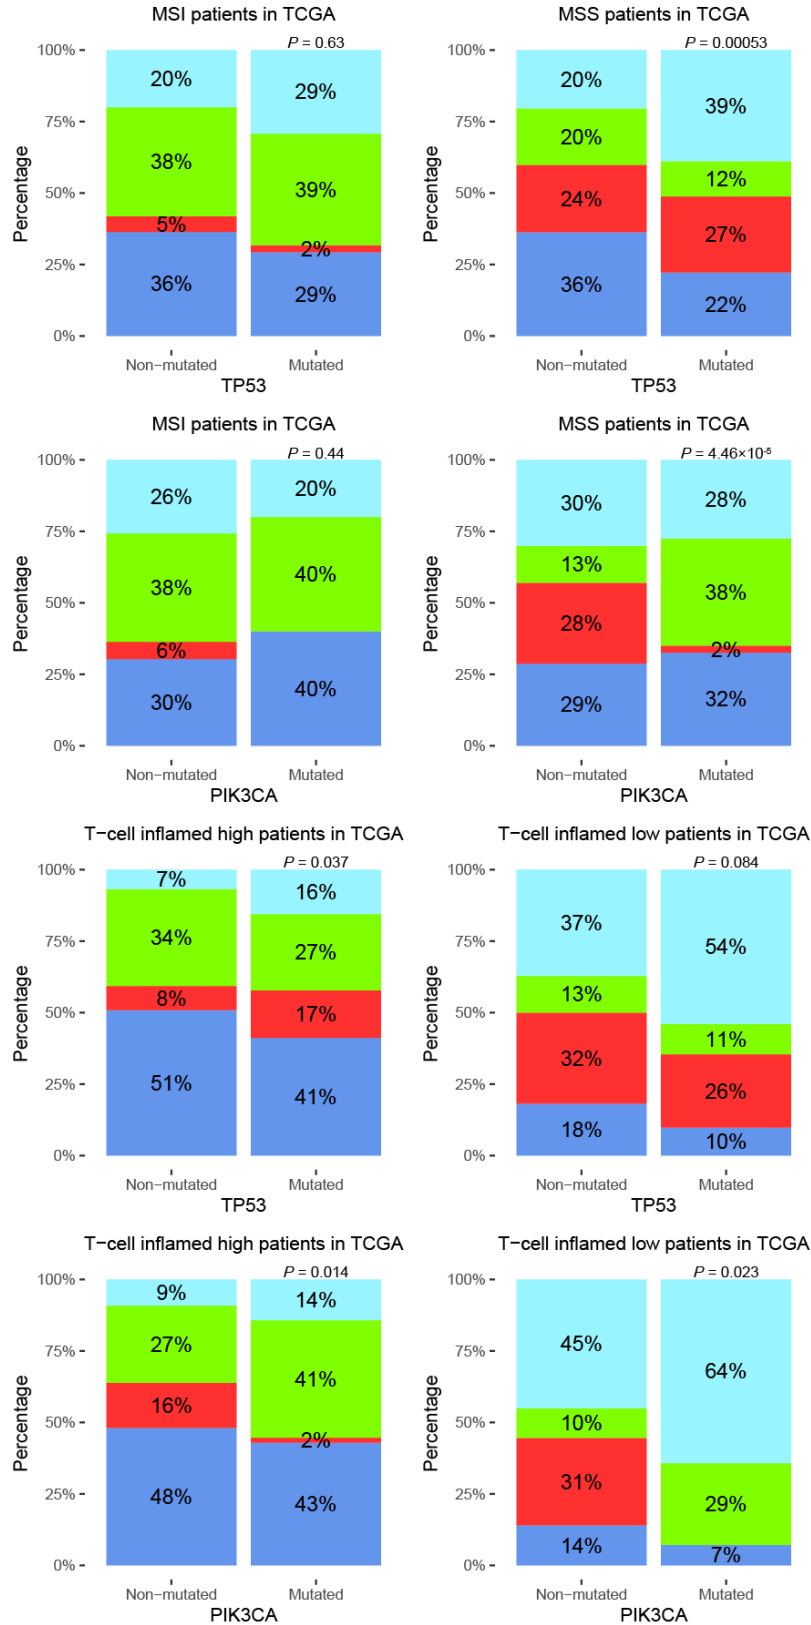

367  
368

369 **Figure S12. Genomic features significantly associated with Stroma status.**

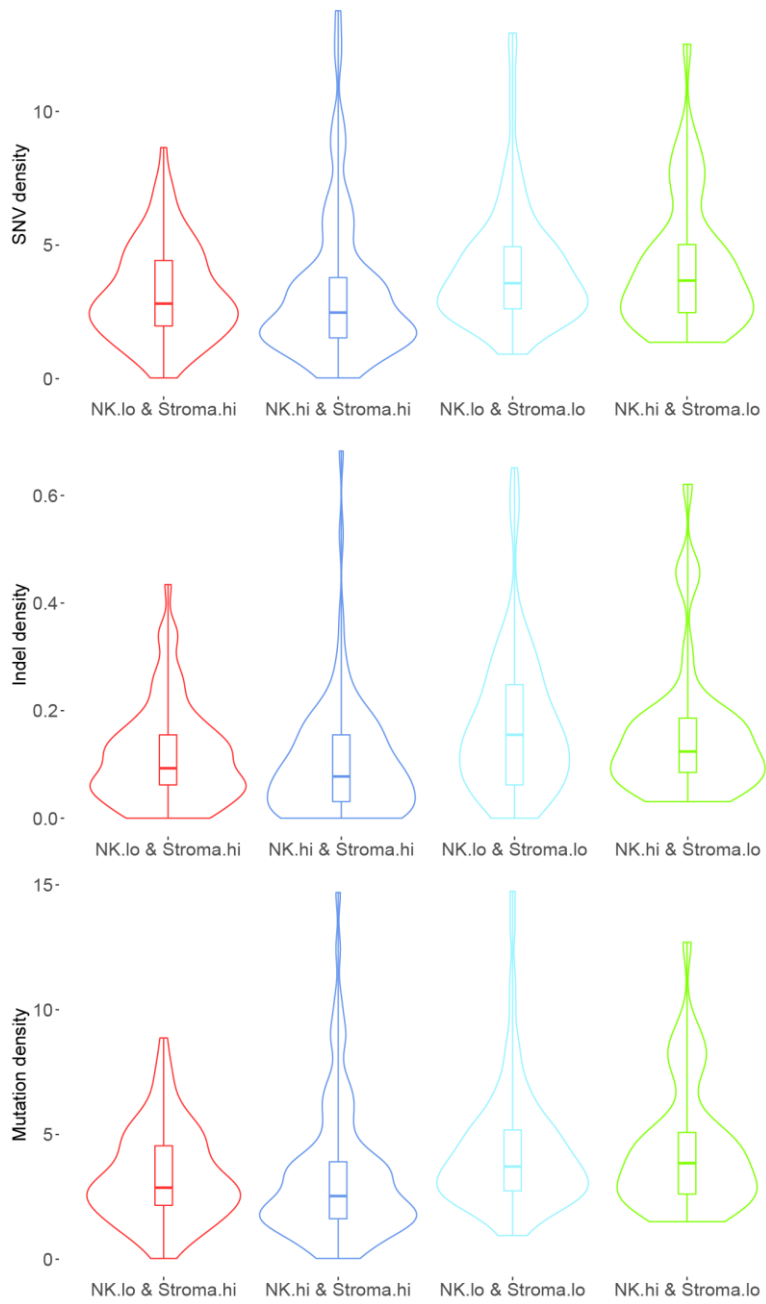

370



371  
372

**Figure S13. Genomic features correlated with both NK and stroma status**

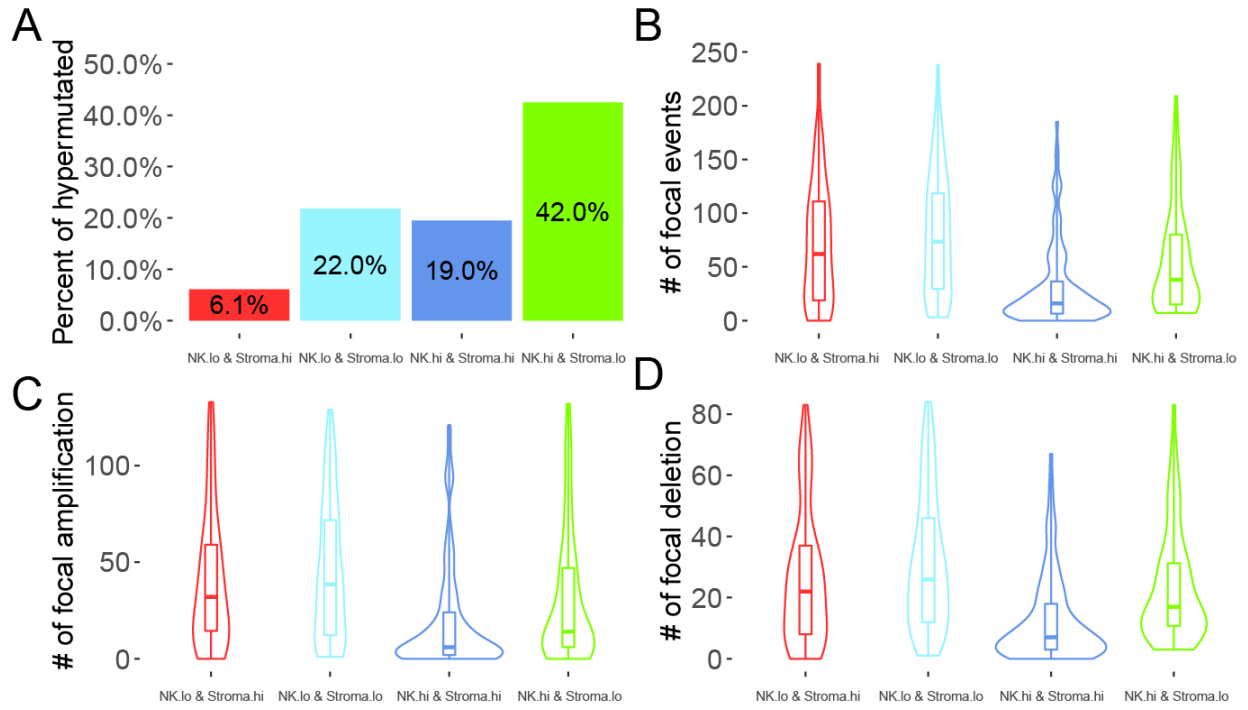

373

374  
375  
376

**Figure S14. Genomic features correlated with NK or stroma status in the patients with CIN from the TCGA cohort.**

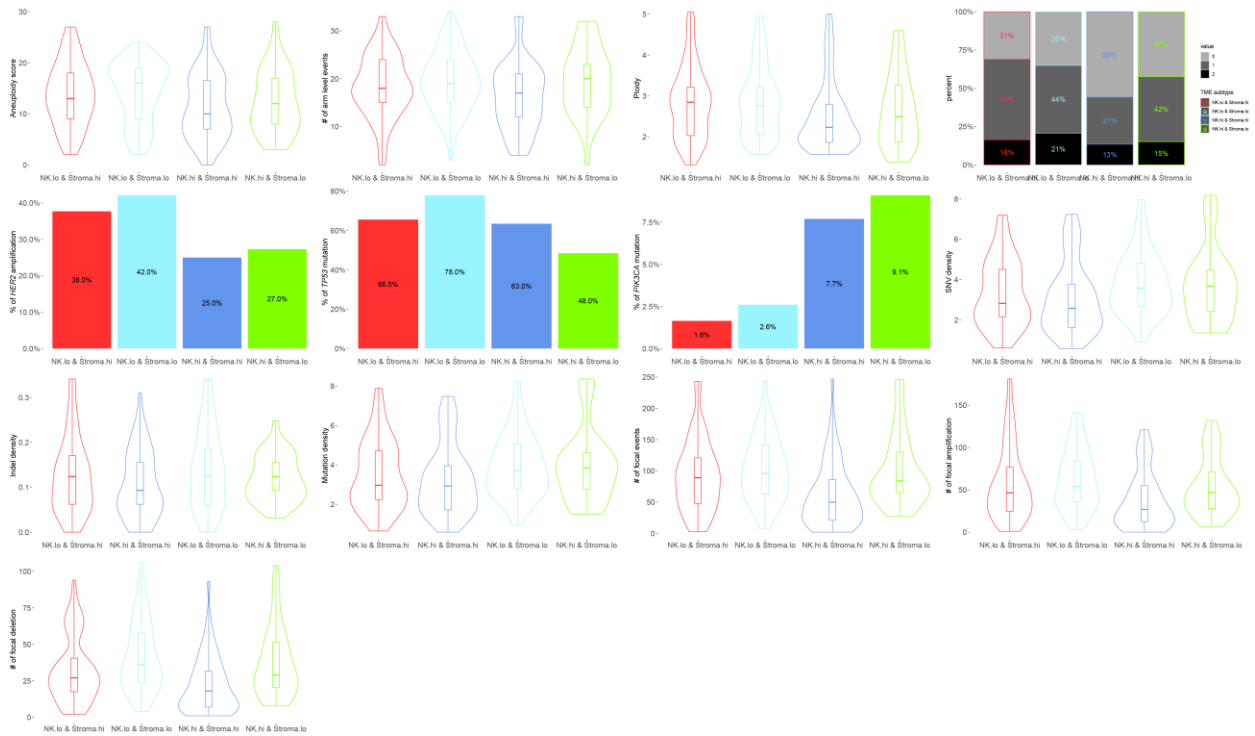

377  
378

379  
380

Figure S15. Top hallmark pathways correlated with NK cell abundance

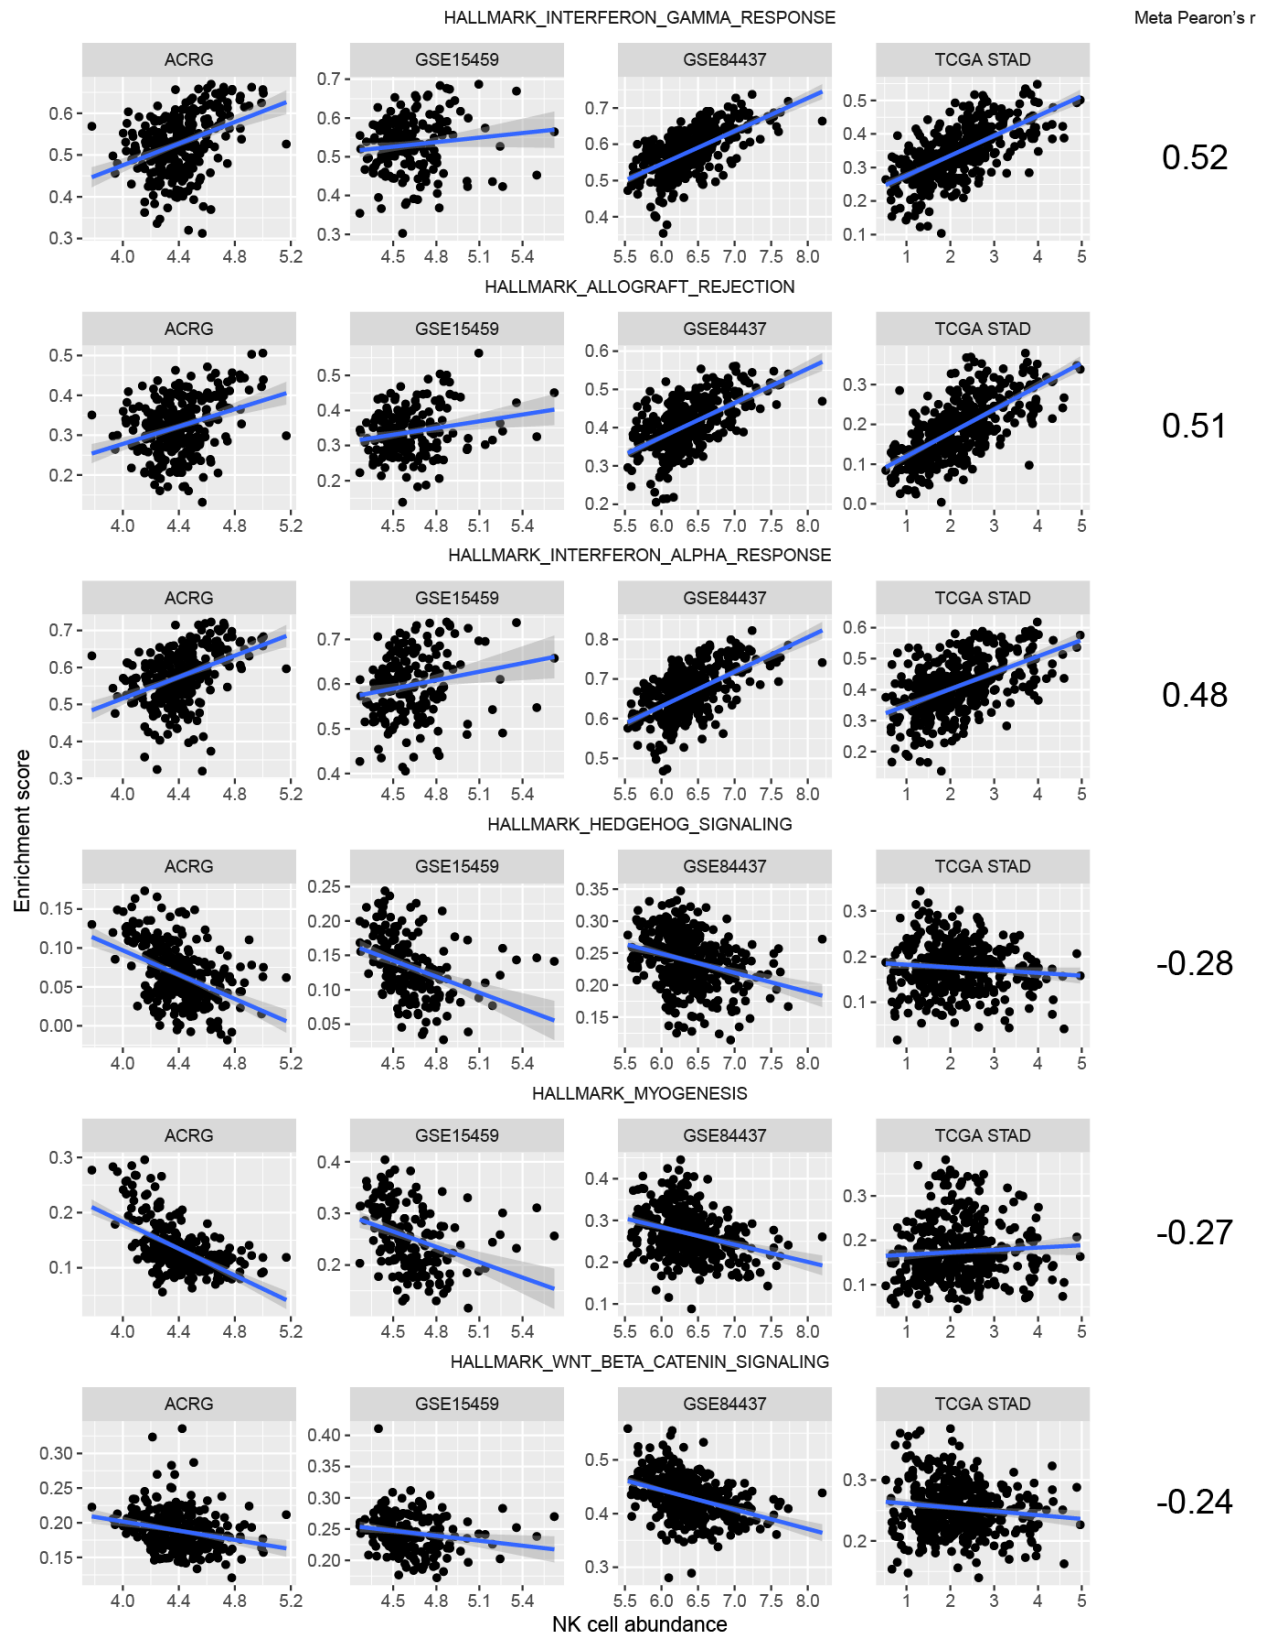

381

382  
383

Figure S16. Top hallmark pathways correlated with Stroma score

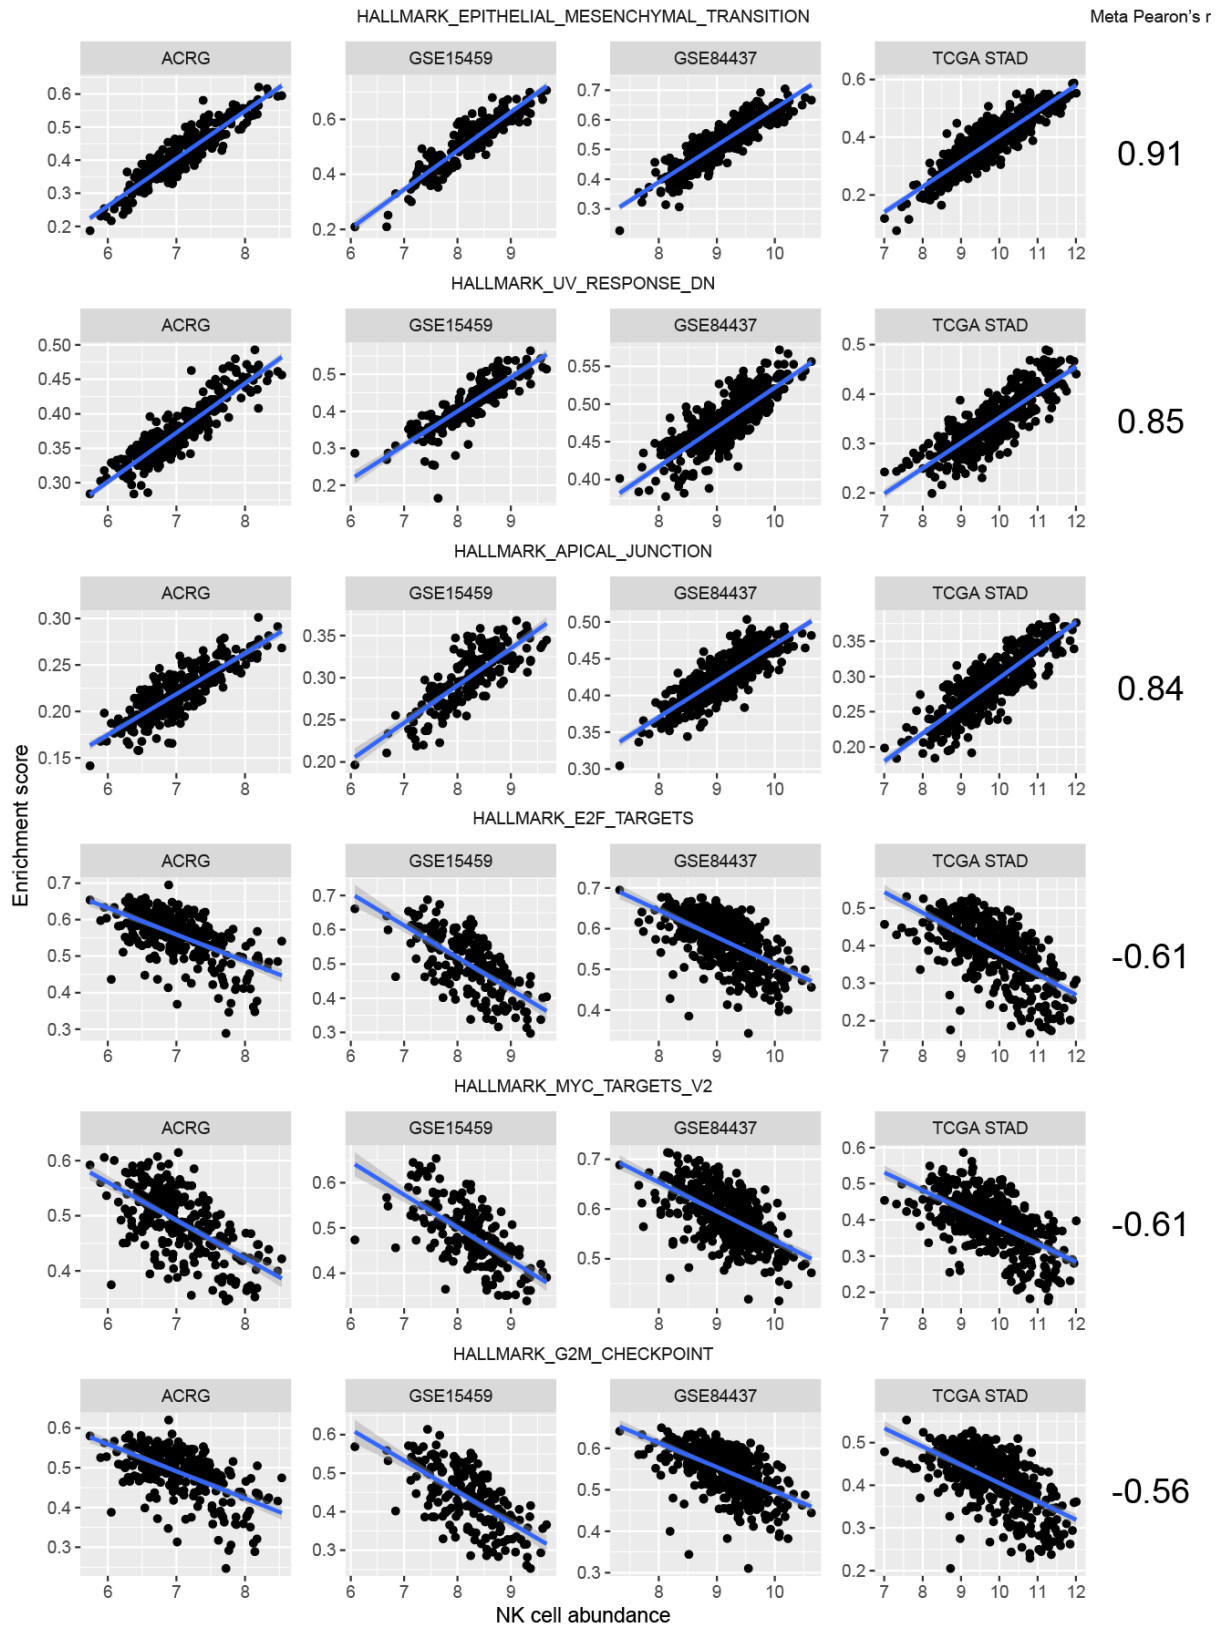

384

385 **Figure S17. Differentially expressed cytokines in different NK (A) and Stroma (B) groups.**

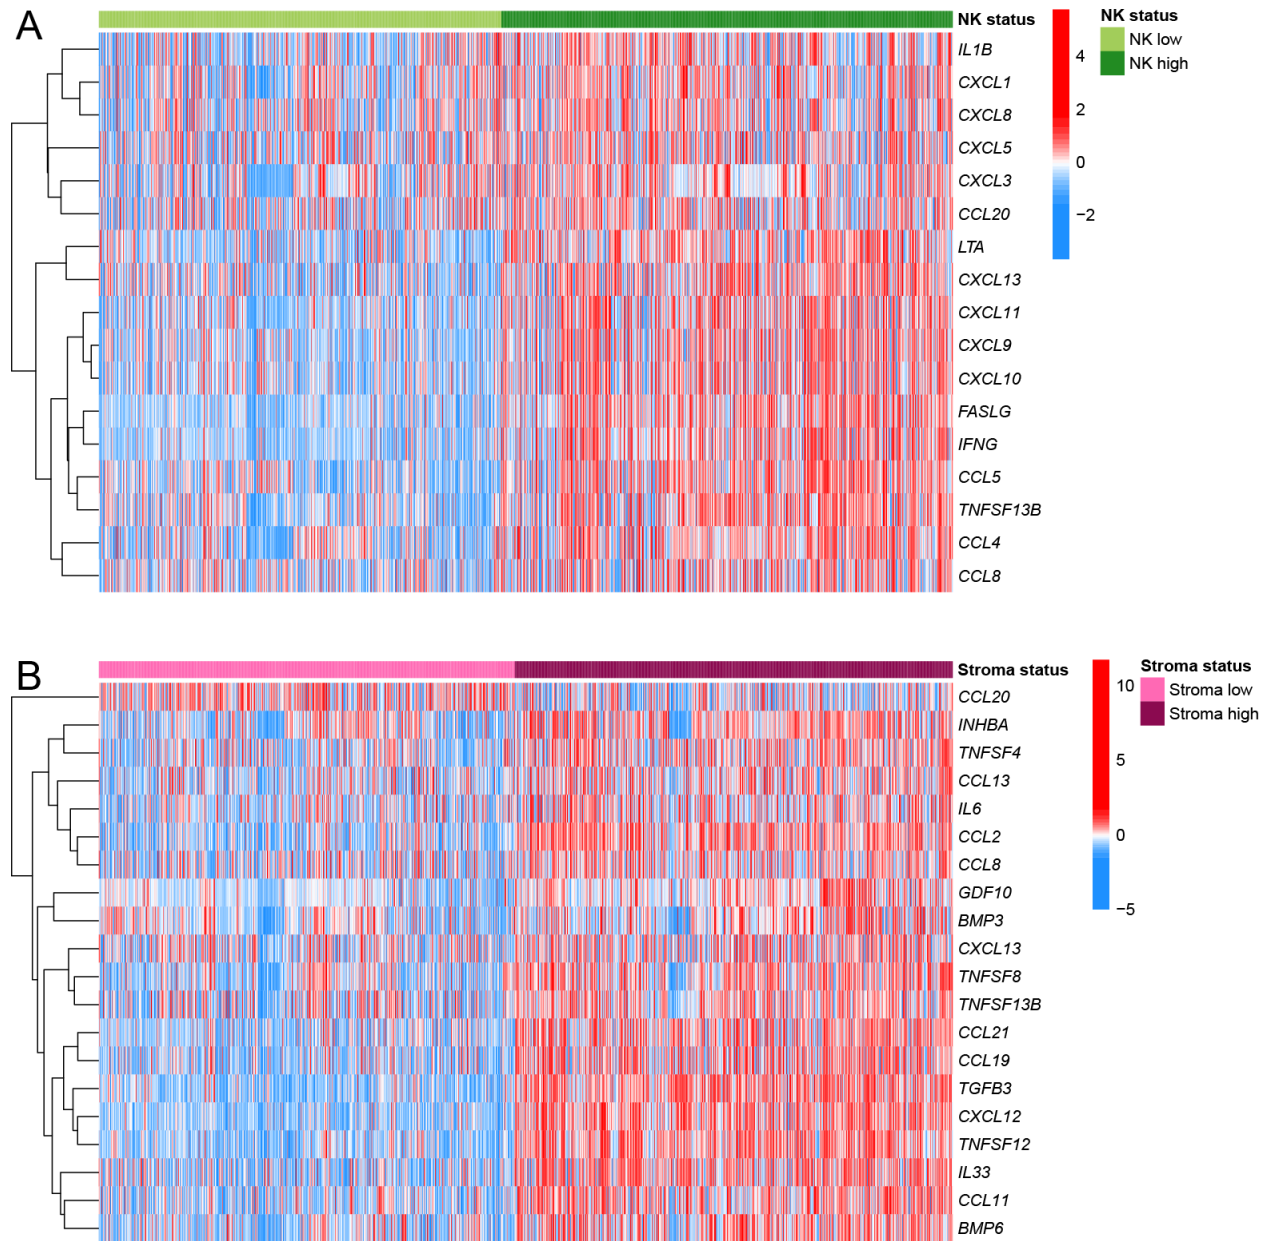

386

387

388
